# Supplementary material for: Nitrile regio-synthesis by Ni centers on a siliceous surface: implications in prebiotic chemistry
Source: Royal Society of Chemistry journal article supplement (doi:10.1039/d2cc04361k), 2022-01-01
Supplement: d2cc04361k1.pdf [file d2cc04361k1.pdf]

## **Electronic Supplementary Information**

### **Nitrile regio-synthesis by Ni centers on a siliceous surface: implications in prebiotic chemistry**

Marco Fioroni\* and Nathan J. DeYonker\*

Department of Chemistry, 213 Smith Chemistry Building, The University of Memphis, Memphis, TN, USA, 38152

Corresponding Authors: Marco Fioroni: [mfioroni@memphis.edu](mailto:mfioroni@memphis.edu)  
Nathan J. DeYonker: [ndeyonker@memphis.edu](mailto:ndeyonker@memphis.edu)

## **Computational Details (ORCA)**

The ORCA software (version 4.2.1) [1a,1b,1c] was used for all geometry minimizations, potential energy surface (PES) and vibrational frequency analyses using the global hybrid functional PBE0 [2] coupled to the split valence triple- $\zeta$  def2-TZVPP basis set with two sets of polarization functions [3] and the atom-pairwise dispersion correction energy with Becke-Johnson damping (D3BJ) [4,5].

The selected level of theory (PBE0-D3BJ/def2-TZVPP) was shown to be one of the most robust, reliable and accurate theoretical tools in the estimation of general main group thermochemistry, kinetics and noncovalent interactions after the double hybrid functionals.

To speed up calculations the RI (Resolution of the Identity) [6] and RIJCOSX [7] algorithms were used coupling the Coulomb-fitting basis sets def2/J [8].

To test if the computed structures represent a minimum or a transition state, frequency calculations within the harmonic approximation were performed on all compound models. The IRC method [9] was used to confirm if the guessed TS were connecting the two considered minima.

Electron correlation effects were considered by running single point calculations on the DFT optimized geometries using the domain-based local pair-natural orbital (DLPNO) approach coupled with the CCSD(T) method [10,11] in conjunction with the cc-pVTZ [12,13] basis set (DLPNO-CCSD(T)/cc-pVTZ). Stability of the HF wavefunction was always analyzed.

The obtained enthalpies and entropies were used to estimate the free energies (G) at T=200 K. The DFT thermal and entropy corrections were added to the single point energies ( $E_{El.}$ ) of the corresponding DLPNO-CCSD(T) levels of theory to obtain the reported H and G values.

Figures were rendered by the program Avogadro [14].

## **References**

- [1a] F. Neese, WIREs Comput. Mol. Sci., 2012, 2, 73–78.
- [1b] F. Neese, F. WIREs Comput. Mol. Sci., 2017, 8, e1327.
- [1c] F. Neese, F. Wennmohs, U. Becker, C. Riplinger, J. Chem. Phys., 2020, 152, 224108
- [2] J. P. Perdew, M. Ernzerhof and K. Burke, J. Chem. Phys., 1996, 105, 9982–9985.
- [3] F. Weigend and R. Ahlrichs, Phys. Chem. Chem. Phys., 2005, 7, 3297–3305.
- [4] S. Grimme, S. Ehrlich and L. Goerigk, J. Comput. Chem., 2011, 32, 1456–1465.
- [5] S. Grimme, J. Antony, S. Ehrlich and H. Krieg, J. Chem. Phys., 2010, 132, 154104.
- [6] F. Neese, J. Comp. Chem., 2003, 24, 1740–1747.
- [7] F. Neese, F. Wennmohs, A. Hansen and U. Becker, Chem. Phys., 2009, 356, 98–109.
- [8] F. Weigend, Phys. Chem. Chem. Phys., 2006, 8, 1057–1065.
- [9] K. Ishida, K. Morokuma and A. Komornicki, J. Chem. Phys., 1977, 66, 2153–2156.
- [10] C. Riplinger and F. Neese, J. Chem. Phys., 2013, 138, 034106.
- [11] C. Riplinger, B. Sandhoefer, A. Hansen and F. Neese, J. Chem. Phys., 2013, 139, 134101.
- [12] T. H. Dunning, J. Chem. Phys., 1989, 90, 1007–1023.
- [13] N. B. Balabanov and K. A. Peterson, J. Chem. Phys., 2006, 125, 074110.
- [14] M. D. Hanwell, D. E. Curtis, D. C. Lonie, T. Vandermeersch, E. Zurek and G. R. Hutchison, J. Cheminform., 2012, 4, 1–17.

## **ORCA input: Opt (OptTS)+Freq**

```
%MaxCore 1000
! UKS RIJCOSX PBE0 def2-TZVPP def2/J SmallPrint TightSCF Slowconv MOREad
! OptTS (or !Opt)
! UNO
! UCO
! GRID5
! GRIDX5
! D3BJ
! DIIS
```

```
%moinp "Start.gbw"
```

```
%scf Maxiter=350
end
```

```
%base "OPT"
```

```
----- ONLY for TS search-----
```

```
%geom
  TS_Mode { B 30 39 }
end
end
```

```
%geom
  modify_internal
  { B 30 39 A }
end
```

```
end
end
```

```
-----
* xyzfile 0 2 Start.xyz
```

```
$new_job
%MaxCore 2000
! UKS RIJCOSX PBE0 def2-TZVPP def2/J SmallPrint TightSCF Slowconv MOREad
! UNO
! UCO
! GRID5
! GRIDX5
! D3BJ
! NumFreq
! DIIS
```

```
%moinp "OPT.gbw"
```

```
%scf Maxiter=350
end
```

```
%base "FREQ"
```

```
%freq Temp 100, 200, 298.15
  CentralDiff true
  Increment 0.0030
end
```

```
* xyzfile 0 2 OPT.xyz
```

## **ORCA input: DLPNO**

```
%MaxCore 12000
! UHF RIJCOSX DLPNO-CCSD(T) cc-pVTZ cc-pVTZ/C NormalPNO TightSCF SCFConvForced
VerySlowConv
! UNO
! GRID6
! GRIDX6
! DIIS
! MOrad

%moinp "OPT.gbwn"

%base "DLPNO"

%scf sthresh 1e-7
end

%scf Maxiter 1500
    DIISMaxEq 15
    DirectResetFreq 1
end

%method Z_solver Pople
    Z_MaxIter 256
end

%scf GuessMode CMatrix
end

%mdci Maxiter 250
end

%mdci
UseFullLMP2Guess false
end

%mdci LocRandom 0
end

%mdci KCOpt KC_MO
end

%mdci Triples 2
end

* xyzfile 0 2 OPT.xyz
```

## **Kinetic calculations**

Kinetic constants were derived by using the Eyring equation:

$$k = (k_B T/h) \exp(-\Delta G_a/k_B T)$$

at three different temperatures: 100, 200 and 300 K.

In the following Table the prefactor ( $k_B T/h$ ) as well as the  $\Delta G_a$  of activation at the corresponding T, are reported.

| <b>Reaction (see Figure 4)</b> | <b><math>k_B T/h</math> (<math>s^{-1}</math>)</b> | <b><math>\Delta G_a</math> (kcal/mol)</b> | <b>k</b> |
|--------------------------------|---------------------------------------------------|-------------------------------------------|----------|
| <b>100 K</b>                   |                                                   |                                           |          |
| 2 → (3 TS I L) → 3L            | 2.0837E+12                                        | 9.6                                       | 2.18E-09 |
| 2 → (3 TS I B) → 3B            | “ “                                               | 5.2                                       | 9.00E+00 |
| 4L → (5TS II L) → 5L           | “ “                                               | 9.4                                       | 5.96E-09 |
| 4B → (5 TS II B) → 5B          | “ “                                               | 11.9                                      | 2.05E-14 |
| <b>200 K</b>                   |                                                   |                                           |          |
| 2 → (3 TS I L) → 3L            | 4.1673E+12                                        | 9.9                                       | 6.33E+01 |
| 2 → (3 TS I B) → 3B            | “ “                                               | 5.3                                       | 6.73E+06 |
| 4L → (5TS II L) → 5L           | “ “                                               | 9.5                                       | 1.73E+02 |
| 4B → (5 TS II B) → 5B          | “ “                                               | 12.0                                      | 3.21E-01 |
| <b>300 K</b>                   |                                                   |                                           |          |
| 2 → (3 TS I L) → 3L            | 6.2510E+12                                        | 10.2                                      | 2.32E+05 |
| 2 → (3 TS I B) → 3B            | “ “                                               | 5.5                                       | 6.16E+08 |
| 4L → (5TS II L) → 5L           | “ “                                               | 9.5                                       | 7.50E+05 |
| 4B → (5 TS II B) → 5B          | “ “                                               | 12.2                                      | 8.10E+03 |

**Table S1.**

The barrierless reactions,  $1 \rightarrow 2$ ,  $3L \rightarrow 4L$ ,  $3B \rightarrow 4B$  are considered fast enough to allow the approximations used in the kinetic simulations:  $1=2$ ,  $3L=4L$  and  $3B=4B$ .

$10^7$  particles were used and the initial concentration of the starting compound 2 was set to 1M. In the next Figure S1 (T=100 K), Figure S2 (T=200 K) and Figure S3 (T=300 K) the calculated kinetics are reported.

Kinetic simulations were conducted by the program “Kinetiscope” based on a stochastic algorithm [14,15].

[14] D. L. Bunker, B. Garrett, T. Kliendienst and G. S. Long III, Combustion and Flame, 1974, 23, 373-379.

[15] D. T. Gillespie, J. Comput. Phys., 1976, 22, 403-434

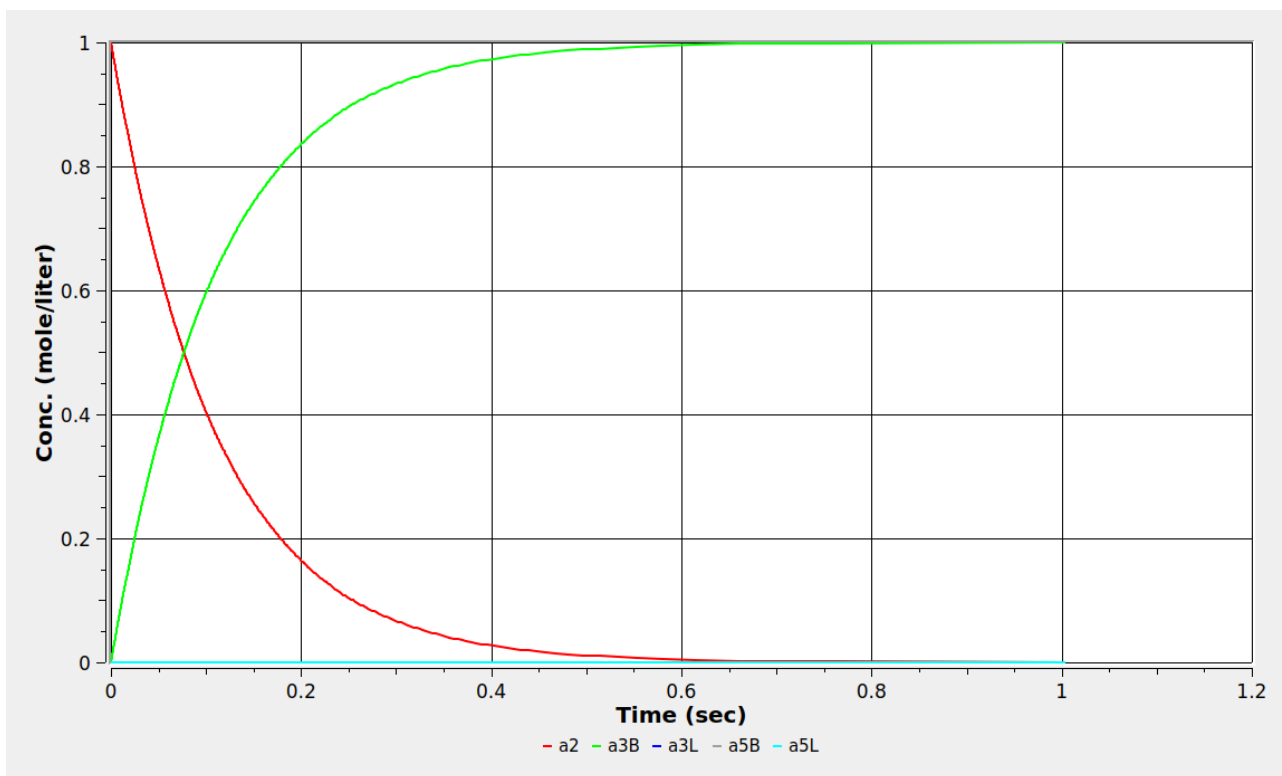

**Fig. S1.** T=100 K.

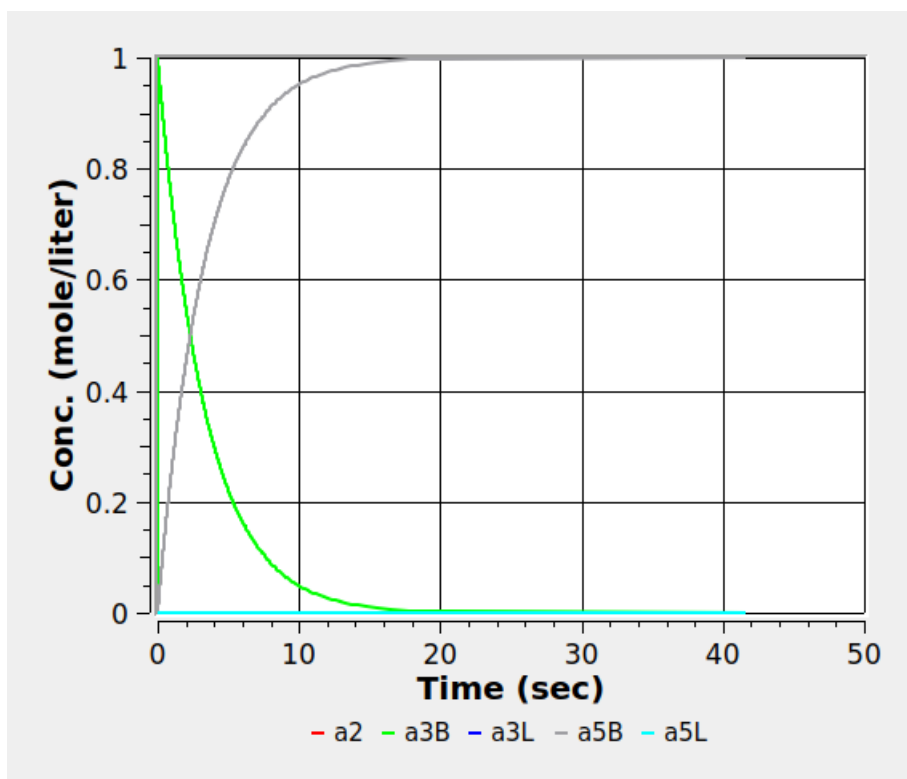

**Fig. S2.** T=200 K.

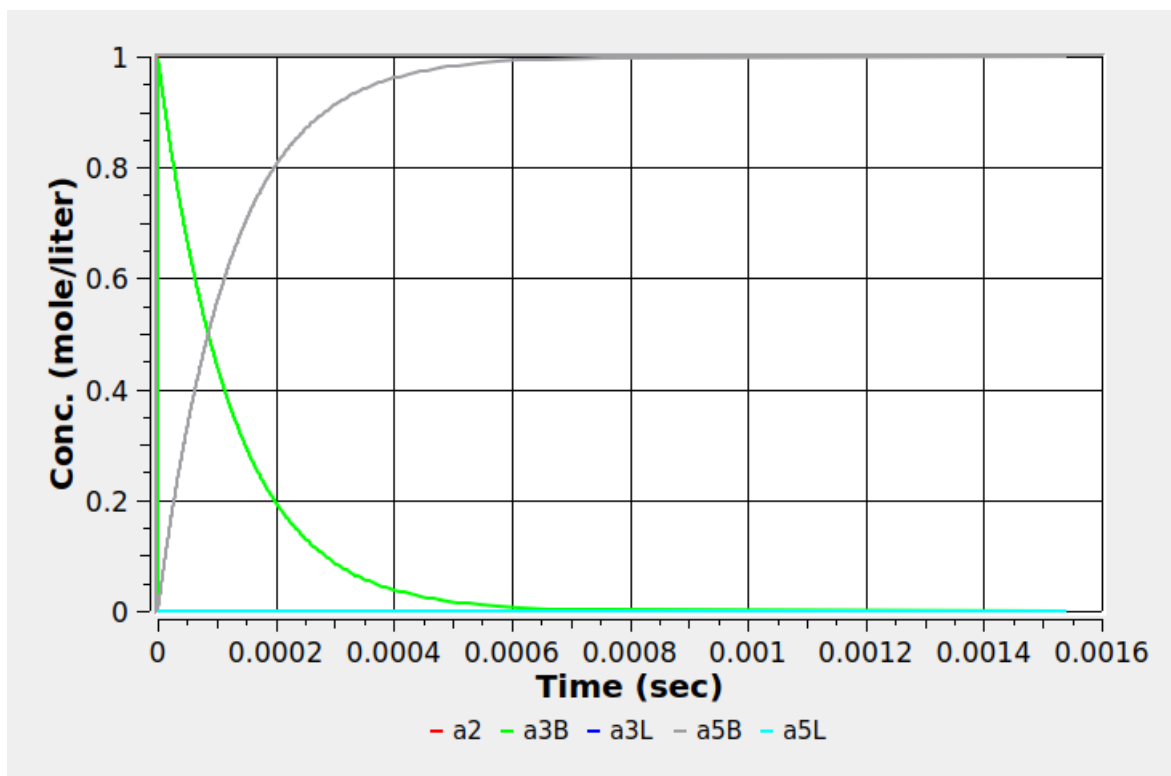

**Fig. S3.** T=300 K.

Observing Fig. S1 it is easy to notice how compound 3B is the only formed intermedia, determining a clear preference for the formation of the branched form. The reaction does not proceed to the final compound 5B due to TS (5 TS IIB) at +12.0 kcal/mol, a too high barrier to be surpassed at T=100 K.

At 200 K (Fig. S2) and 300 K ( Fig. S3) the 5B is strongly favored over the 5L.

The final concentrations are:

200 K: [5L]= $10^{-5}$  and [5B]=0.99999

300 K: [5L]=0.00045 and [5B]=0.99955

## PES

### H Oxydative Addition

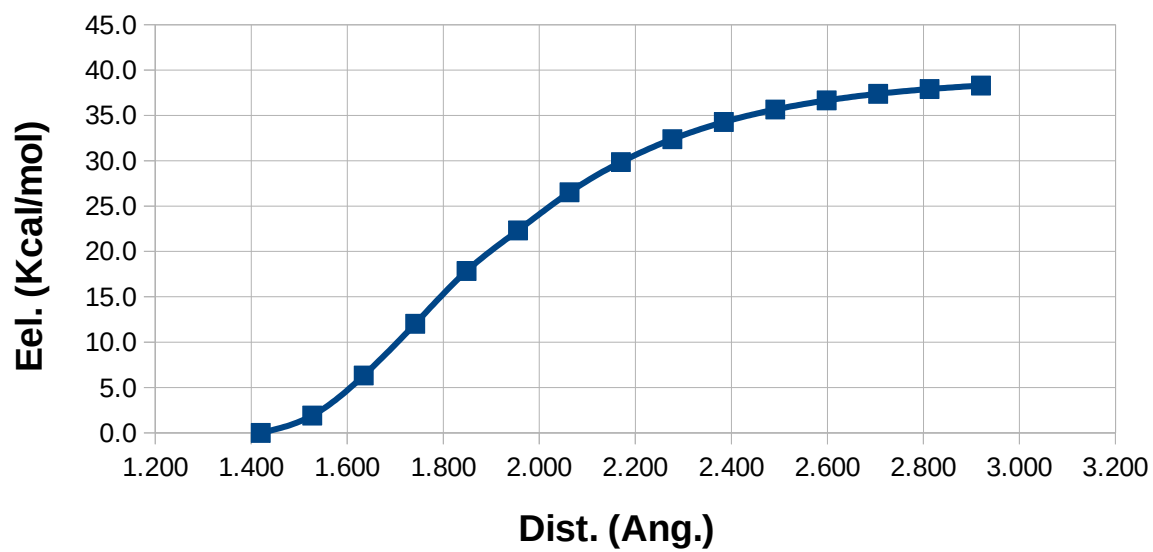

**Fig. S4**

---

### CN Radical Addition

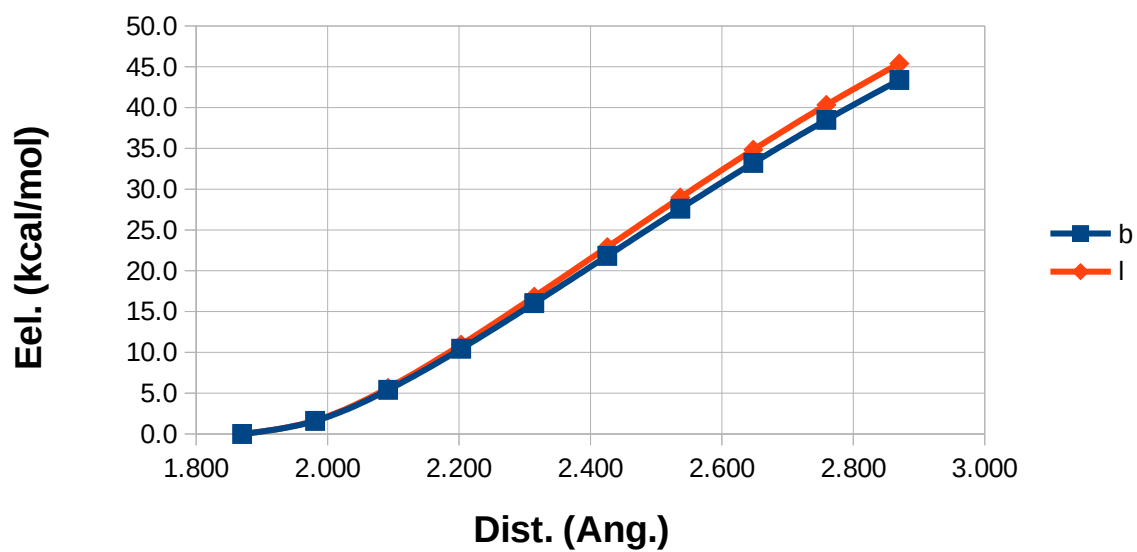

**Fig. S5**

---



## Spin dependent energies

### Free Catalyst

|                                |     |      |       |
|--------------------------------|-----|------|-------|
| Multiplicity                   | M2  | M4   | M6    |
| $\Delta G$ (kcal/mol) T=200 K) | 0.0 | 51.4 | 187.1 |

### Ligand Exchange

|                                |     |      |      |
|--------------------------------|-----|------|------|
| Multiplicity                   | M2  | M4   | M6   |
| $\Delta G$ (kcal/mol) T=200 K) | 0.0 | 49.7 | 99.5 |

### H Oxidative Addition

|                                |     |      |      |
|--------------------------------|-----|------|------|
| Multiplicity                   | M1  | M3   | M5   |
| $\Delta G$ (kcal/mol) T=200 K) | 0.0 | 26.3 | 90.7 |

## Configuration dependent energies

The Substrate/Reactant-POSS-Ni system was found to explore mainly three different configurations that can be schematically represented in Figure S6.

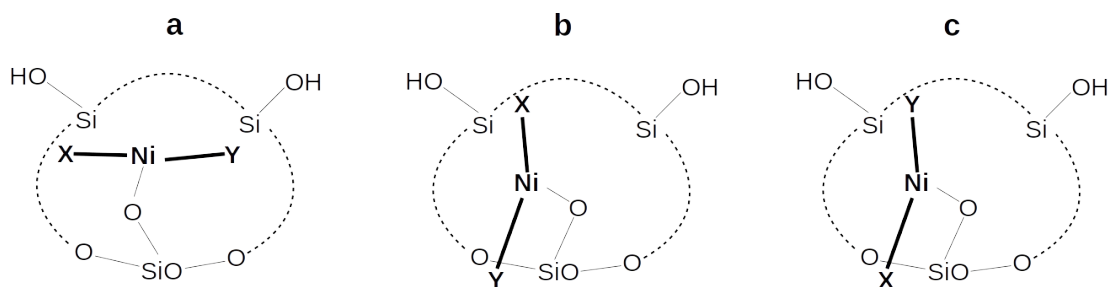

**Fig. S6**

In configuration **a**, no ligand is in *trans* to the O, while in configurations **b** and **c**, the two ligands are, alternatively, in *trans* to the O atom.

In Figure S7, the three calculated representative conformers (H oxidative addition step) corresponding to the schemes of Figure S6, are reported.

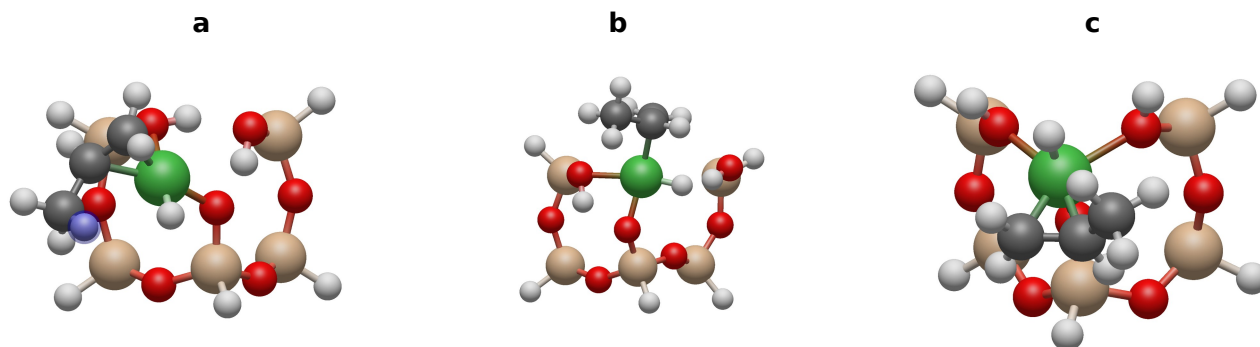

**Fig. S7.** Background atoms of the POSS have been deleted for clarity

A systematic search was conducted on all the reaction steps and configuration **a** was systematically found to be lower in energy. Generally, the energy difference compared to the **a** configuration is always  $\Delta G < 18.0$  kcal/mol with an average of  $\Delta G = 5-10$  kcal/mol, depending from the reaction step.

## Comparison between DFT and DLPNO-CCSD(T) corrected energies

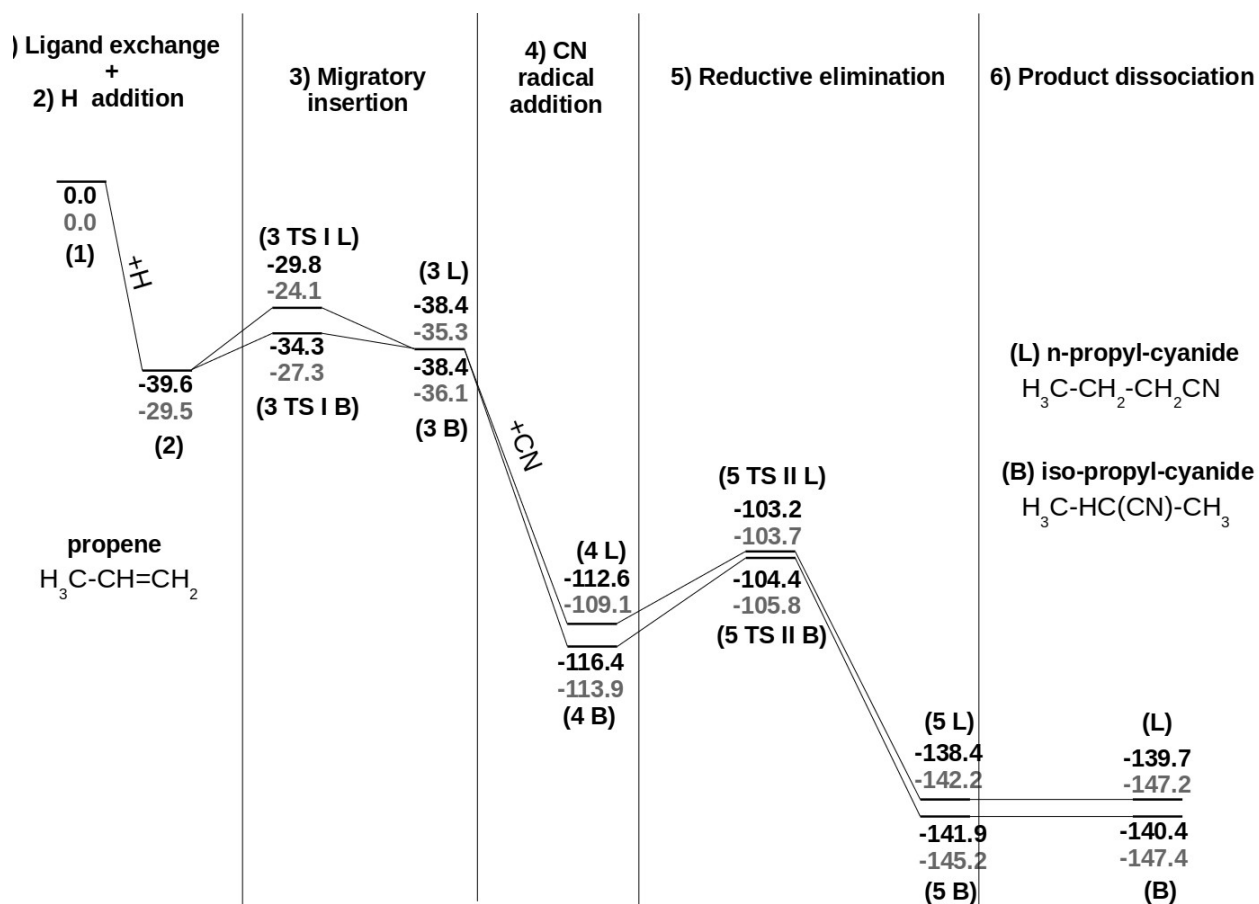

**Fig. S8.**  $\Delta G$  energies at the DFT (PBE0/def2-TZVPP - gray color) and DLPNO-CCSD(T)/cc-pVTZ (black color).

The agreement between the two levels of theory is satisfactory with the DFT calculated TS energies showing a clear trend toward lower barriers.

### Snapshots of the elementary steps

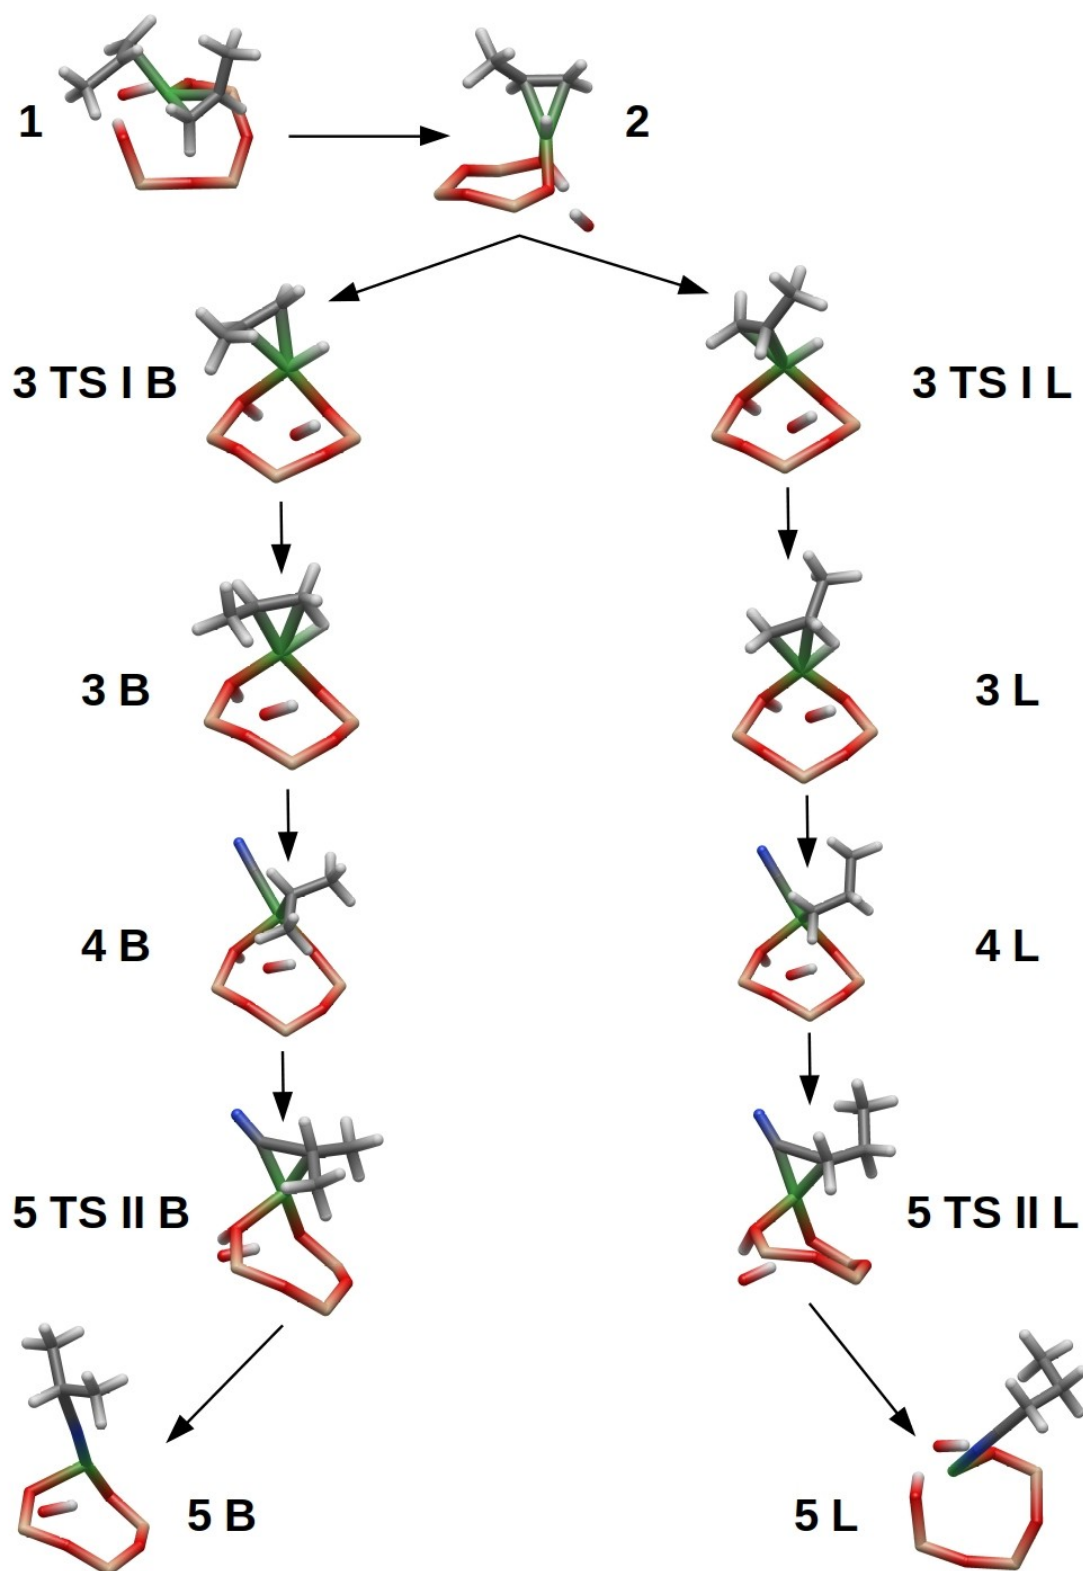

**Fig. S9** Snapshots of the minima corresponding to five of the elementary steps as reported in Fig. 4 in the main text.

For clarity, only half of the POSS moiety is depicted and hydrogen atoms on the Si atoms have been deleted. The “free” -OH represents the 2<sup>nd</sup> silanol (SiOH) of the deleted ring, involved in a hydrogen bond with the SiOH oxygen of the displayed ring.

## Propene hydrocyanation no Ni-catalyst

OPT+entropy correction: PBE0/def2-TZVPP      SP: DLPNO-CCSD(T)/cc-pVTZ

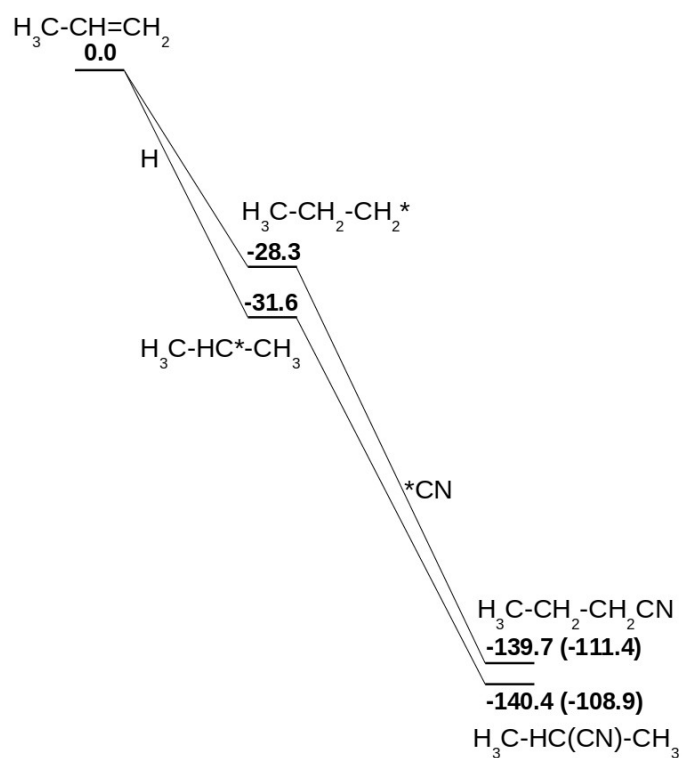

**Fig. S10** Radical addition to propene of H and \*CN. Energies:  $\Delta G$  (kcal/mol), T= 200 K.

## XYZ

### Free Catalyst

#### M2

|    |                   |                   |                   |
|----|-------------------|-------------------|-------------------|
| O  | 3.58006541631013  | -1.03792606232330 | -0.25670872053715 |
| Si | 4.75085745146389  | -2.26559717318544 | -0.30806870590051 |
| O  | 0.47550734813113  | -2.90077695264384 | 0.40153486559343  |
| Si | 0.42744790820548  | -4.40319249392168 | -0.15979137550861 |
| O  | 1.74817234603495  | -4.74618565115675 | -1.08943987665943 |
| Si | 3.33831151611109  | -4.91857076767130 | -1.22165039678587 |
| O  | 4.07338156417289  | -3.44622333073535 | -1.14961599127106 |
| Si | 1.65063527703423  | -3.14465312377305 | 3.61881939804748  |
| O  | 1.31679780853864  | -4.73220372364855 | 3.46969173664965  |
| Si | 1.10882691279129  | -5.96979347895045 | 2.44194973294554  |
| O  | 3.07610083660366  | -2.87504957875144 | 2.83146526576428  |
| Si | 4.58704582100648  | -3.38092413713004 | 2.57398422138862  |
| O  | 2.57034721443603  | -6.61806070058021 | 2.10647034688501  |
| O  | 4.65301940500948  | -4.98400080824432 | 2.36781854410939  |
| Si | 4.03477975000464  | -6.24317221012651 | 1.53705484598281  |
| O  | 0.49707003421184  | -2.20390645317630 | 3.00647888062092  |
| O  | 0.41039937457829  | -5.48675028749812 | 1.06564394621314  |
| O  | 5.12632266807494  | -2.64449950471320 | 1.20831186475653  |
| O  | 3.94980366739582  | -5.83388418075721 | -0.03393250731520 |
| H  | 5.92992683126011  | -1.71911549031770 | -0.98509541057507 |
| H  | 1.82453430150093  | -2.82805894788875 | 5.04255110399932  |
| H  | 0.28567740723638  | -6.99991706358758 | 3.07992625894194  |
| H  | 3.67652072737996  | -5.50888125272331 | -2.51838998386961 |
| H  | 5.49058900430649  | -2.99914296045209 | 3.66389873908483  |
| H  | -0.75461681235907 | -4.66544866133479 | -0.99332758161713 |
| H  | 4.92871469872362  | -7.39353034212015 | 1.68265986996446  |
| H  | 3.78853946019792  | -0.27389084212988 | 0.28721756073648  |
| H  | 0.29237657602760  | -2.38372138284807 | 2.06426856225915  |
| Ni | 1.81616548561087  | -1.77202243761024 | -0.06626519390353 |

### Free Catalyst

#### M4

|    |                   |                   |                   |
|----|-------------------|-------------------|-------------------|
| O  | 3.15444999513009  | -1.25059412252270 | -0.09355985011539 |
| Si | 4.53453178447716  | -2.22765384895351 | -0.19686217417354 |
| O  | 0.30888984330816  | -2.96816326446064 | -0.06582508519839 |
| Si | 0.37324820847059  | -4.52474812305728 | -0.44967893054151 |
| O  | 1.77514091298216  | -4.86973776597406 | -1.26208256565037 |
| Si | 3.38752498703385  | -4.94885888167922 | -1.26763135993794 |
| O  | 4.11044764840240  | -3.47167122270770 | -1.12998649713917 |
| Si | 1.88268479395494  | -3.06355022013439 | 3.63111974301372  |
| O  | 1.18418641227317  | -4.47533408689684 | 3.28981619780646  |
| Si | 1.04964747789250  | -5.80153045666295 | 2.32024273256283  |
| O  | 3.49139294542292  | -2.97846068966018 | 3.48635036072832  |
| Si | 4.81978402633389  | -3.44630152220954 | 2.64292050592493  |
| O  | 2.52597982270099  | -6.44412872977577 | 2.11688322905936  |
| O  | 4.76987949576489  | -5.02077225118689 | 2.28972590278578  |
| Si | 4.00865290051177  | -6.22532096762875 | 1.49902021251975  |
| O  | 1.26956345098283  | -1.87633460359265 | 2.58745243045213  |
| O  | 0.34820758588816  | -5.46853913080200 | 0.90795959430747  |
| O  | 5.08647797202806  | -2.54605677565880 | 1.29805433589122  |
| O  | 3.95338319078641  | -5.91455668348042 | -0.09074691032584 |
| H  | 5.57222439775278  | -1.44137998309725 | -0.87414996131111 |
| H  | 1.51049426188259  | -2.68170656710672 | 4.99788450406898  |
| H  | 0.21876372723024  | -6.76360537303414 | 3.04978734582916  |
| H  | 3.82195369519614  | -5.49198047700163 | -2.55757974722855 |
| H  | 5.96213646600365  | -3.19934932339353 | 3.52671895510374  |
| H  | -0.74209737739957 | -4.96941714429460 | -1.29740138351639 |

|    |                  |                   |                  |
|----|------------------|-------------------|------------------|
| H  | 4.78024077769078 | -7.45392632262553 | 1.70440300049700 |
| H  | 3.24912037996561 | -0.36766287774370 | 0.27458327144510 |
| H  | 0.30952521120552 | -1.81236739526573 | 2.53210844395325 |
| Ni | 1.93688500612708 | -2.67539118939253 | 0.79793369918887 |

### Free Catalyst

#### M6

|    |                   |                   |                   |
|----|-------------------|-------------------|-------------------|
| O  | 3.13434036886476  | -1.41000214462631 | 0.34997878695663  |
| Si | 4.45977018215507  | -2.28126370297199 | -0.16762714576060 |
| O  | 0.36905650022890  | -3.08072035590072 | -0.00135424876082 |
| Si | 0.48050671454649  | -4.74844920090000 | -0.29670837783058 |
| O  | 1.82687749899851  | -5.06540838359680 | -1.12013614684381 |
| Si | 3.45219446593455  | -5.00301536164105 | -1.24084266057092 |
| O  | 3.90602950060490  | -3.44426127578410 | -1.14503155620568 |
| Si | 1.70631215702596  | -3.08006251071053 | 3.05924573973441  |
| O  | 1.55902926242325  | -4.75451708400386 | 3.44851775346657  |
| Si | 1.23103930467273  | -5.97759119371026 | 2.46659242030035  |
| O  | 3.37373622295842  | -2.85027593527650 | 3.05733806750173  |
| Si | 4.77310089304766  | -3.50468072026918 | 2.60521319889508  |
| O  | 2.59666033075500  | -6.68950563994270 | 1.92323761801354  |
| O  | 4.69366083730603  | -5.11714536511691 | 2.42123299511177  |
| Si | 4.11839232675372  | -6.32383622148038 | 1.50563720911792  |
| O  | 1.35045139847191  | -1.36806015849846 | 2.21286233105504  |
| O  | 0.39061690183605  | -5.47366774071802 | 1.12615284596799  |
| O  | 5.19446582113944  | -2.85529653115483 | 1.14960857772465  |
| O  | 4.14008462887731  | -5.85993359414549 | -0.05910923594244 |
| H  | 5.36288904328360  | -1.41148750781849 | -0.92399850233597 |
| H  | 1.20365560297453  | -2.52989242106478 | 4.34642930097815  |
| H  | 0.39975977255692  | -7.00128507611291 | 3.10837429677650  |
| H  | 3.83993062829814  | -5.53976614970997 | -2.54586212433415 |
| H  | 5.83378551812405  | -3.19202985845125 | 3.56649877851509  |
| H  | -0.67557424429993 | -5.03645336312936 | -1.15342883553527 |
| H  | 4.96768593974237  | -7.50683235990137 | 1.65659038045909  |
| H  | 3.12464934973846  | -1.26372035293109 | 1.31098314914359  |
| H  | 0.81101849572087  | -0.78858959393291 | 2.75738477549937  |
| Ni | 1.02919457726013  | -1.22135019649948 | 0.24968060890269  |

---

### Ligand Exchange

#### M2

|    |                   |                   |                   |
|----|-------------------|-------------------|-------------------|
| O  | -1.56503605214373 | -0.34911891916903 | -2.63764704019399 |
| Si | -2.17249372381460 | -0.69257097027490 | -4.13545137752031 |
| O  | -0.32368146032097 | -2.52704037937914 | -1.06111725600991 |
| Si | -0.45869851399978 | -4.03575093130353 | -1.58733065948560 |
| O  | -1.76816221359287 | -4.20016785024110 | -2.59095608816991 |
| Si | -2.28301409474131 | -3.85458480566575 | -4.09138997889986 |
| O  | -2.61903054665774 | -2.25868080344109 | -4.23692273466454 |
| Si | 2.16538086225386  | -1.05129133427284 | -3.30841046510741 |
| O  | 2.59606100394519  | -2.62407452707503 | -3.21600085596384 |
| Si | 2.05078019167538  | -4.14179460249729 | -3.47778554949491 |
| O  | 1.56915316477773  | -0.71249880204719 | -4.79794043845837 |
| Si | 0.37687609507241  | -0.83867548670807 | -5.90083576898722 |
| O  | 1.50094975391253  | -4.25848550193759 | -5.01620668100847 |
| O  | 0.22319075890533  | -2.37553908557055 | -6.42811748565889 |
| Si | 0.22035546308719  | -3.94602670808487 | -5.97531391528502 |
| O  | 1.03708861011972  | -0.71780251825763 | -2.17478146398538 |
| O  | 0.87296153045690  | -4.52379432903570 | -2.42294281506622 |
| O  | -1.04331752721435 | -0.33658032059747 | -5.25984136640039 |
| O  | -1.16910720286559 | -4.29927550664330 | -5.19889690962216 |
| H  | -3.37411133645495 | 0.11805942453549  | -4.36161675581157 |
| H  | 3.35338157978656  | -0.21071488795930 | -3.11534476758109 |
| H  | 3.16672469596317  | -5.07890607832974 | -3.32059599610091 |

|    |                   |                   |                   |
|----|-------------------|-------------------|-------------------|
| H  | -3.52084342828034 | -4.60025130195266 | -4.34224729980360 |
| H  | 0.70126447939640  | 0.02312332126227  | -7.04071760212148 |
| H  | -0.67503500992430 | -5.00210060566884 | -0.49437693873513 |
| H  | 0.31641559997780  | -4.76718476927081 | -7.18539484886453 |
| Ni | -1.91587715383926 | -1.45399025471796 | -0.65827261287933 |
| C  | -0.93249289039415 | -0.35225660168078 | 0.81563438127796  |
| C  | -2.11825582707667 | 0.29750275819414  | 0.59060434360765  |
| C  | -2.25248123955341 | 1.52362955067656  | -0.26072266647615 |
| H  | -1.37513612445707 | 1.67193965324540  | -0.89376762317090 |
| H  | -2.36479004687000 | 2.40389935336355  | 0.38616931221625  |
| H  | -3.13680266135003 | 1.47702526837274  | -0.90463357973776 |
| C  | -3.45531925651653 | -2.70749759805096 | -0.03148105165328 |
| C  | -3.60094156628270 | -2.83881573653216 | 1.45562263338485  |
| C  | -3.96637515309105 | -1.65608891767043 | -0.77824289827553 |
| H  | -2.69294659902266 | -3.23687169768952 | 1.92060320360765  |
| H  | -4.41292295658933 | -3.54101132414265 | 1.68734589594989  |
| H  | -3.84908324565194 | -1.88295734657332 | 1.92629040167060  |
| H  | -4.51346292747358 | -0.84153080697864 | -0.30997639445808 |
| H  | -4.13390548673813 | -1.78430559723796 | -1.84762821059542 |
| H  | -3.21501392157164 | -3.62924600265177 | -0.56357240174552 |
| H  | -2.95703155766599 | 0.07756277210347  | 1.24918544566159  |
| H  | -0.01630594296530 | -0.02143801982485 | 0.32812361948636  |
| H  | -0.82136697328834 | -1.06605516873657 | 1.62769522407832  |
| H  | -0.57737515200503 | -0.29876734016013 | -2.58733011706374 |
| H  | 0.61176400308330  | -1.51420866372221 | -1.67812384588435 |

## Ligand Exchange

### M4

|    |                   |                   |                   |
|----|-------------------|-------------------|-------------------|
| O  | 2.84422900267682  | -2.64422585235319 | -3.56901329332850 |
| Si | 3.99490141816942  | -3.55138760117672 | -2.89464445105394 |
| O  | 0.45896806406227  | -3.19862953162757 | -2.49467535553796 |
| Si | -0.10804590402397 | -4.68915758653855 | -2.61951968600211 |
| O  | 1.06588694450908  | -5.71588874636217 | -3.09737281893618 |
| Si | 2.55658659367814  | -6.28913218437898 | -2.81910990236495 |
| O  | 3.67839501367997  | -5.14562957162031 | -3.05850703760461 |
| Si | 0.88309026075437  | -2.36526353696987 | 0.99348826445034  |
| O  | -0.06451078369044 | -3.65560104547868 | 0.88182216971427  |
| Si | -0.30246068704647 | -5.20111796501738 | 0.39520410680592  |
| O  | 2.42083474982544  | -2.63988229909119 | 0.63094671683245  |
| Si | 3.76085837413603  | -3.49317468616739 | 0.24918717213605  |
| O  | 1.03789540769961  | -6.06277881334605 | 0.69486980263658  |
| O  | 3.48099132118546  | -5.06083819279589 | 0.55258995863950  |
| Si | 2.57810970285247  | -6.38465678018985 | 0.27908795146808  |
| O  | 0.25504568779668  | -1.25758707717251 | -0.08762715099491 |
| O  | -0.68678602681637 | -5.21660182006260 | -1.17157829155108 |
| O  | 4.13516162978420  | -3.24018363774403 | -1.29179920951898 |
| O  | 2.66055520436398  | -6.81401730196219 | -1.27758633721644 |
| H  | 5.28137618527404  | -3.24977718218204 | -3.53158570438006 |
| H  | 0.78954511190183  | -1.76422609392582 | 2.33167696172738  |
| H  | -1.41234864647584 | -5.75189293133791 | 1.17754428906935  |
| H  | 2.81471351669733  | -7.42051030668362 | -3.71390532435365 |
| H  | 4.85481679985081  | -3.02969938846815 | 1.10790888881683  |
| H  | -1.22079379863099 | -4.81845560231403 | -3.57867135661981 |
| H  | 3.07151565506431  | -7.48195102010427 | 1.11423114862846  |
| H  | 1.93211226213970  | -2.84735174631835 | -3.26508917539672 |
| H  | 0.56155723388838  | -0.35105417717659 | -0.00385899497447 |
| Ni | -0.08902901647887 | -1.40371485533229 | -2.15866899596207 |
| C  | -2.31375994928847 | -2.00826954040306 | -2.04611378586653 |
| C  | -2.37090981868997 | -0.66345416330929 | -2.05809549038298 |
| C  | -2.54452949184907 | 0.19304918060031  | -0.85466407312620 |
| H  | -2.40351844964875 | -0.36799594748711 | 0.06834093353372  |



|   |                   |                   |                   |
|---|-------------------|-------------------|-------------------|
| H | -3.55784631249698 | 0.60511218700525  | -0.85741715720772 |
| H | -1.85769039943761 | 1.03983705128209  | -0.87496191456867 |
| H | -2.34201466552936 | -2.57893867613084 | -2.96657108194179 |
| H | -2.35441270015433 | -2.56931146198582 | -1.11847312705787 |
| H | -2.39428034285326 | -0.14405525999417 | -3.01292063337196 |
| H | -0.40108795352069 | 0.80785971614665  | -4.52272375289078 |
| C | -0.30106295597927 | 1.24738225345627  | -3.53423058741514 |
| C | -0.60161713850721 | 2.69332189296236  | -3.38626791396579 |
| C | 0.45811811652425  | 0.50202174468170  | -2.50955870819453 |
| H | 1.51640667046624  | 0.38308813503954  | -2.80280750548963 |
| H | 0.47509001330488  | 1.08486567696626  | -1.57578011093267 |
| H | -1.31310129274024 | 3.05205515193030  | -4.13256355344895 |
| H | 0.30589503089482  | 3.31140488411973  | -3.48057304417283 |
| H | -1.00895763732246 | 2.91914670901827  | -2.39335183862822 |

## Ligand Exchange

### M6

|    |                   |                   |                   |
|----|-------------------|-------------------|-------------------|
| O  | 2.56702409455784  | -2.09783265117795 | -3.72270253531119 |
| Si | 3.71823676332421  | -3.12953306910574 | -3.25055932863859 |
| O  | 0.25385461298918  | -2.59391241732454 | -2.41811647564254 |
| Si | -0.40228766081324 | -4.05841139684570 | -2.46616774052493 |
| O  | 0.66219881469920  | -5.12105325202155 | -3.09602092556292 |
| Si | 2.13977947556342  | -5.78421285011888 | -3.06736770278006 |
| O  | 3.26741670259773  | -4.68525661001099 | -3.45109369926172 |
| Si | 1.03751113589814  | -2.00859099660342 | 1.05649597251467  |
| O  | 0.20066261782876  | -3.37787293437650 | 1.20033997587390  |
| Si | -0.27086237801210 | -4.80054104398508 | 0.54642182782723  |
| O  | 2.40241021940569  | -2.16687836224379 | 0.22124818439772  |
| Si | 3.70162549131940  | -3.10101922755875 | -0.11825503474030 |
| O  | 0.98834792907893  | -5.82283408840112 | 0.56878782827157  |
| O  | 3.34156546970211  | -4.64135134846473 | 0.23928289204044  |
| Si | 2.50083648939831  | -6.01326835497355 | -0.00155594675933 |
| O  | 0.13204394261941  | -0.90570781404533 | 0.20089060798591  |
| O  | -0.80867206926509 | -4.56853424461240 | -0.95886757091494 |
| O  | 4.08766328128276  | -2.92073153714848 | -1.66813713371942 |
| O  | 2.44950991283066  | -6.37203835135323 | -1.57845077617278 |
| H  | 4.92997596432465  | -2.87661897905353 | -4.03728688623209 |
| H  | 1.27972254449865  | -1.46116233453283 | 2.39779983790024  |
| H  | -1.34886958102002 | -5.34593102416526 | 1.37502354981870  |
| H  | 2.19692796400156  | -6.89244518264631 | -4.02412709461161 |
| H  | 4.82815302935911  | -2.67326358039262 | 0.71790022739208  |
| H  | -1.63321727393847 | -4.12287702186397 | -3.27115928633512 |
| H  | 3.14684768948004  | -7.10604871382553 | 0.72903439852971  |
| H  | 1.68024142736908  | -2.25342467574925 | -3.32984770909445 |
| H  | -0.80810113241471 | -0.77502001429367 | 0.50578517538732  |
| Ni | -0.34038788131603 | -0.94602406995229 | -1.76914501936145 |
| C  | -2.29347914544753 | -0.52497136285996 | -1.45535424602002 |
| C  | -2.62220004669278 | -0.69561311198678 | -0.01791722626037 |
| C  | -3.13505570569320 | -1.99931914875249 | 0.47294019713072  |
| H  | -2.60730477384426 | -2.83578513597654 | 0.00736396703483  |
| H  | -4.19591113268753 | -2.12358247839421 | 0.20692149625819  |
| H  | -3.06420665237864 | -2.10077732712913 | 1.55775344939736  |
| H  | -2.43092175075916 | 0.50470944142134  | -1.79711590583617 |
| H  | -2.88737648429789 | -1.18952991838024 | -2.09221019610740 |
| H  | -2.84983261943712 | 0.18781478639523  | 0.57494051020348  |
| H  | -0.37732549439261 | -0.17906779095860 | -4.41632614564555 |
| C  | 0.37548295869047  | 0.53577693190312  | -4.09615972109733 |
| C  | 1.10270617303992  | 1.30104651639058  | -5.14359493573931 |
| C  | 0.86451844114423  | 0.52614997227843  | -2.72148260119765 |
| H  | 1.84461234208239  | 0.07179390102965  | -2.54153249801358 |
| H  | 0.68047157083038  | 1.40673390721289  | -2.10052451318184 |

|   |                  |                  |                   |
|---|------------------|------------------|-------------------|
| H | 0.54939894840653 | 1.31506931912007 | -6.08281467821392 |
| H | 2.08555631190328 | 0.85089812172532 | -5.33759235272842 |
| H | 1.28460146418424 | 2.33378152380850 | -4.83083321225888 |

---

### H Oxydative Addition

#### M1

|    |                   |                   |                   |
|----|-------------------|-------------------|-------------------|
| O  | 2.39656774509667  | -1.36892736443263 | -1.03300515917186 |
| Si | 3.58727174494926  | -2.32595878802069 | -1.67310051761751 |
| O  | -0.08628061398275 | -2.56153890557366 | -1.37891071152094 |
| Si | -0.56975807474252 | -3.83762194720956 | -2.22710589952784 |
| O  | 0.57984090421026  | -4.26159317255030 | -3.32961410506473 |
| Si | 2.17189382232351  | -4.48478869486738 | -3.46426102448186 |
| O  | 2.97640519915240  | -3.17046099334196 | -2.91223617243505 |
| Si | 1.27049062397523  | -3.76144596826367 | 1.76298700116332  |
| O  | 0.33197310856843  | -4.95712522030419 | 1.19388672137524  |
| Si | -0.09216418449702 | -5.94779804985488 | -0.02240182945092 |
| O  | 2.84519348331234  | -4.15626006969279 | 1.60703710523214  |
| Si | 4.03945260509862  | -4.49283874931226 | 0.56680554029760  |
| O  | 1.23636561362217  | -6.71302584388223 | -0.56878851289043 |
| O  | 3.73381452292672  | -5.87808420205555 | -0.21769227998160 |
| Si | 2.70847056512741  | -6.62436561514107 | -1.23542569609038 |
| O  | 0.97889421742342  | -2.40340876684912 | 0.90785613272541  |
| O  | -0.78626877099433 | -5.11315605168994 | -1.22313861378403 |
| O  | 4.18094633341792  | -3.27390293601882 | -0.50845475398140 |
| O  | 2.65129687879626  | -5.78776980271870 | -2.62530519129438 |
| H  | 4.64114084386414  | -1.44944475667657 | -2.19749637611594 |
| H  | 1.00508615628783  | -3.55604617976425 | 3.19104099069094  |
| H  | -1.03454591337932 | -6.94722333786781 | 0.48794584643540  |
| H  | 2.52204038813052  | -4.66973726430888 | -4.87596611992155 |
| H  | 5.30232936379279  | -4.61995788755636 | 1.29666675789324  |
| H  | -1.82292964055943 | -3.63205270717312 | -2.96862977453946 |
| H  | 3.20781866118892  | -7.97576823860901 | -1.49874568021536 |
| H  | 2.02462767163918  | -1.68304673095027 | -0.16798030484273 |
| H  | 0.39433333521995  | -2.51644885972016 | 0.09317580147967  |
| Ni | 0.67993221775417  | -1.08928974688836 | -2.20523726816977 |
| H  | 2.74036959531867  | -0.13859937582035 | -3.29374359998054 |
| C  | 1.70010088779745  | 0.08392762091414  | -3.51811696612041 |
| C  | 1.28881199343667  | -0.15887048918412 | -4.93152156710445 |
| C  | 0.99997803883614  | 0.83970850290442  | -2.60790534864284 |
| H  | 1.48127946376412  | 1.19568034092214  | -1.70330363604944 |
| H  | 0.06722845020077  | 1.31649668668219  | -2.88339019544329 |
| H  | 1.40955225982020  | -1.20937463432366 | -5.20380741199375 |
| H  | 1.92696806026787  | 0.42325274715689  | -5.60356419253043 |
| H  | 0.25121430845677  | 0.12540322234375  | -5.10291372107517 |
| H  | -0.49031186562144 | -0.96099777030119 | -2.99030926725486 |

### H Oxydative Addition

#### M3

|    |                   |                   |                   |
|----|-------------------|-------------------|-------------------|
| O  | 3.00809909944055  | -1.50481841010234 | -1.03956606508854 |
| Si | 4.08537455756089  | -2.56106207631373 | -1.72985370904278 |
| O  | 0.25727185974299  | -2.62183394281300 | -2.12915298827992 |
| Si | -0.15829522283921 | -3.91176116706886 | -2.91423490104806 |
| O  | 1.13441777487054  | -4.53220024535378 | -3.74606655770992 |
| Si | 2.71003738585617  | -4.72135358752117 | -3.49646517767782 |
| O  | 3.38665263321019  | -3.32623702921042 | -2.96323462976600 |
| Si | 0.97148166203538  | -3.42607279568499 | 1.35873123885757  |
| O  | 0.11134082402120  | -4.55609867529122 | 0.61391692344320  |
| Si | -0.21598121347367 | -5.72957544752750 | -0.47804850520402 |
| O  | 2.56981283079779  | -3.59759128280206 | 1.12531788921594  |
| Si | 3.90403868780969  | -4.41814169606289 | 0.66898558579339  |
| O  | 1.12175402720221  | -6.64538771921835 | -0.64795183345438 |

|    |                   |                   |                   |
|----|-------------------|-------------------|-------------------|
| O  | 3.51713920752887  | -5.91351055181525 | 0.20158890878269  |
| Si | 2.69972208039294  | -6.65925459092021 | -1.00254345218270 |
| O  | 0.71228892283796  | -1.90469324671759 | 0.77031621783832  |
| O  | -0.66488292235595 | -5.10527137726908 | -1.88939445282113 |
| O  | 4.57183845224894  | -3.58785173403751 | -0.56455909570923 |
| O  | 2.99758057275997  | -5.87742618449964 | -2.38736800035044 |
| H  | 5.23597619998575  | -1.80394983574057 | -2.23513932662946 |
| H  | 0.65589879996277  | -3.46201323534285 | 2.79376621248111  |
| H  | -1.28688760209306 | -6.57104381359517 | 0.06386234971989  |
| H  | 3.37188228475551  | -5.09908688828410 | -4.74974760715068 |
| H  | 4.85203503871729  | -4.48013507737502 | 1.78407694051955  |
| H  | -1.23205731827525 | -3.74809330707264 | -3.91271903309402 |
| H  | 3.16881721570935  | -8.04356603810525 | -1.09573691342423 |
| H  | 2.88863683785487  | -1.64957997558582 | -0.09570574967779 |
| H  | -0.14524043087086 | -1.47919835128899 | 0.86739938049959  |
| Ni | 0.72251878534776  | -0.98399625041800 | -1.36672152398842 |
| H  | 2.12255377735378  | -0.98526597181829 | -3.78126444093134 |
| C  | 1.33823664690609  | -0.24230747061324 | -3.66360207816868 |
| C  | 0.17281940419879  | -0.36448039341347 | -4.57553510638682 |
| C  | 1.49158416691910  | 0.72943814227187  | -2.75024399533478 |
| H  | 2.40803810420182  | 0.82263184164184  | -2.17740894376827 |
| H  | 0.75229875946730  | 1.51210488493322  | -2.63647289970161 |
| H  | -0.26768032075873 | -1.36035483701022 | -4.50527733085198 |
| H  | 0.49740182489680  | -0.22784400474954 | -5.61095659309678 |
| H  | -0.59371169125760 | 0.37624966738651  | -4.34891804737085 |
| H  | -0.42338170266896 | -0.08182732559069 | -0.81874268924056 |

## H Oxydative Addition

### M5

|    |                   |                   |                   |
|----|-------------------|-------------------|-------------------|
| O  | 2.82107600469413  | -2.09509002449367 | -3.65684273732112 |
| Si | 3.92278569685633  | -3.11598197493463 | -3.05097491544362 |
| O  | 0.56448197177824  | -3.06647865557462 | -2.47757667402740 |
| Si | -0.01974716571244 | -4.53331011274572 | -2.76516162259007 |
| O  | 1.12664250176437  | -5.46585054387913 | -3.47046231879741 |
| Si | 2.67649961433685  | -5.92777979154244 | -3.42565879035587 |
| O  | 3.65195057503385  | -4.63887130355459 | -3.56185615516594 |
| Si | 0.83826196279062  | -3.09565629481904 | 1.32185625811878  |
| O  | 0.08879738599781  | -4.49847359684110 | 1.10410393559692  |
| Si | -0.04844663064409 | -5.78774583738896 | 0.09924536492857  |
| O  | 2.31410394692573  | -3.03025330090512 | 0.71281447490251  |
| Si | 3.69909686755230  | -3.63809177114477 | 0.08457205367417  |
| O  | 1.36842697168039  | -6.57536469100441 | 0.09253520763505  |
| O  | 3.66120347110865  | -5.25751483078293 | 0.13699966234079  |
| Si | 2.91506762694194  | -6.60491380209737 | -0.40024938909510 |
| O  | -0.01530123503337 | -1.91456932182982 | 0.48686762425261  |
| O  | -0.45956990689014 | -5.28839654258856 | -1.37554390966026 |
| O  | 3.81604275510675  | -3.08968303519208 | -1.41657678442252 |
| O  | 2.98576748116707  | -6.68405307772770 | -2.01226213773531 |
| H  | 5.26888774514422  | -2.71665894006399 | -3.47596903296286 |
| H  | 0.80036252810339  | -2.73495284835531 | 2.74460987266667  |
| H  | -1.08422021857234 | -6.66777966224231 | 0.64488839139164  |
| H  | 2.94646593266119  | -6.86157022769433 | -4.52175977007536 |
| H  | 4.81500843107416  | -3.16693606871619 | 0.90949027713071  |
| H  | -1.20360050406415 | -4.53150960427641 | -3.63756743867010 |
| H  | 3.58102111383702  | -7.77483746238388 | 0.17555006103808  |
| H  | 1.91487445802712  | -2.33795439288714 | -3.36621011743352 |
| H  | -0.90529045472749 | -1.76310316028749 | 0.81766950707774  |
| Ni | -0.17317224712829 | -1.63364486856892 | -1.55204657165310 |
| H  | -0.02333416810137 | 0.22734785012618  | -3.74791819935437 |
| C  | 0.83614720125908  | 0.54742164630150  | -3.16903801197954 |
| C  | 1.71308367660410  | 1.62089356060608  | -3.70816488154316 |

|   |                   |                   |                   |
|---|-------------------|-------------------|-------------------|
| C | 1.07265526145332  | 0.00737729202408  | -1.83378010832939 |
| H | 2.01758135506703  | -0.52399022131321 | -1.67500690123095 |
| H | 0.82981939400445  | 0.66375032772842  | -0.98875390655464 |
| H | 1.51036373074764  | 1.82011728358021  | -4.76002324245487 |
| H | 2.76745820061570  | 1.34238289005437  | -3.60907947048641 |
| H | 1.58101854408391  | 2.56045165528895  | -3.15454231261104 |
| H | -1.72283987554374 | -1.51118653987391 | -1.58284729080020 |

---

### 3 TS I B

#### M1

|    |                   |                   |                   |
|----|-------------------|-------------------|-------------------|
| O  | 2.63536764546243  | -1.30693258800890 | -0.49101223407615 |
| Si | 3.85324097139521  | -2.25113064878301 | -1.09858214184010 |
| O  | 0.19939774705633  | -2.26714783624647 | -1.23140556265807 |
| Si | -0.26266417943899 | -3.38863424085274 | -2.28015248121713 |
| O  | 0.96941095826480  | -3.76943031809345 | -3.30330491447496 |
| Si | 2.55314598107199  | -4.08003330652165 | -3.31391219947042 |
| O  | 3.36889631808465  | -2.93280034816944 | -2.48180125850054 |
| Si | 1.07600472971598  | -3.96584265806243 | 1.84551078178596  |
| O  | 0.13325763964007  | -5.02574756202525 | 1.05508462738227  |
| Si | -0.16596595659281 | -5.79611606734991 | -0.34519744564415 |
| O  | 2.62742662868043  | -4.46590100550733 | 1.79482006252174  |
| Si | 3.93239113791758  | -4.70345105163618 | 0.86756445238675  |
| O  | 1.19438248456069  | -6.53837503650986 | -0.84300031077550 |
| O  | 3.68427001516253  | -5.93558217197070 | -0.15647293425657 |
| Si | 2.73003424595911  | -6.49440058447993 | -1.34985016835767 |
| O  | 0.96817164073106  | -2.49972120155860 | 1.14183955295339  |
| O  | -0.67731218543318 | -4.74778253710760 | -1.46571528695585 |
| O  | 4.25178086684406  | -3.35062768127931 | 0.01386180379835  |
| O  | 2.86480262815832  | -5.52733494777630 | -2.64728267602382 |
| H  | 4.99826522825029  | -1.38106665066759 | -1.38761626059280 |
| H  | 0.67246441002902  | -3.90597991477361 | 3.25425376443674  |
| H  | -1.19894526865462 | -6.80953835624725 | -0.11737871838482 |
| H  | 3.04542606625537  | -4.07355789456068 | -4.69427941354797 |
| H  | 5.08826475716603  | -5.00439060827297 | 1.71490984937884  |
| H  | -1.40646525087924 | -2.99969722833839 | -3.11946742766851 |
| H  | 3.17042321063782  | -7.84385818529326 | -1.71031348021742 |
| H  | 2.14699050269885  | -1.70682359322652 | 0.27607326180196  |
| H  | 0.48544886109110  | -2.45972569637210 | 0.25000046278020  |
| Ni | 1.12758794689993  | -0.73264093188616 | -1.76864559692303 |
| H  | 2.89747524036625  | 0.97552887354327  | -1.51156317283778 |
| C  | 2.30178282081267  | 0.77967522172189  | -2.39775717118287 |
| C  | 3.05190768334916  | 0.46089588799322  | -3.65268098705246 |
| C  | 0.98236320464083  | 1.18536574972362  | -2.39919053353434 |
| H  | 0.54855013181824  | 1.67402203968796  | -1.53282462817762 |
| H  | 0.46031776488928  | 1.36043982265477  | -3.33217571778226 |
| H  | 3.73868936187787  | -0.37591186743954 | -3.51905084008657 |
| H  | 3.65365521507877  | 1.32294390884478  | -3.95798690939163 |
| H  | 2.37353101667743  | 0.21603162187806  | -4.47077878821869 |
| H  | 0.04686777975474  | -0.43739040703042 | -2.63793935937650 |

### 3 TS I L

#### M1

|    |                   |                   |                   |
|----|-------------------|-------------------|-------------------|
| O  | 2.40632158091208  | -1.35016767400356 | -0.87192798351378 |
| Si | 3.69011113860468  | -2.28816535014601 | -1.33479656608048 |
| O  | 0.00947424714142  | -2.53543463494310 | -1.46803980371712 |
| Si | -0.35372116035866 | -3.82048642909544 | -2.35854680381217 |
| O  | 0.90434832800351  | -4.22345487695225 | -3.34196760884857 |
| Si | 2.50034116717869  | -4.46519512900240 | -3.32118232815452 |
| O  | 3.25706121577710  | -3.21975371526573 | -2.58194096159055 |
| Si | 1.03138177578431  | -3.82740903667224 | 1.79042279402663  |
| O  | 0.16283165776469  | -5.04984027319547 | 1.16356353974417  |

|    |                   |                   |                   |
|----|-------------------|-------------------|-------------------|
| Si | -0.08807022538460 | -5.98253233860246 | -0.14501197475865 |
| O  | 2.61186269648796  | -4.23364592447289 | 1.80284696760004  |
| Si | 3.92634904423364  | -4.46699216257927 | 0.88767317813892  |
| O  | 1.31388584402042  | -6.69757642681936 | -0.56111708390463 |
| O  | 3.75237525249270  | -5.78267536417732 | -0.04416400084252 |
| Si | 2.83415226909428  | -6.60206050007696 | -1.10699335825300 |
| O  | 0.83706070943889  | -2.48195321243065 | 0.89263688247224  |
| O  | -0.64710010113841 | -5.09912366945725 | -1.37938245017487 |
| O  | 4.16535796073685  | -3.16169723116900 | -0.06274548824321 |
| O  | 2.87048513383045  | -5.84079010492684 | -2.54240172919701 |
| H  | 4.76629695392206  | -1.39521038475050 | -1.77839156259961 |
| H  | 0.61744876292166  | -3.59946932918843 | 3.17882683026472  |
| H  | -1.06637569852173 | -7.01850952188378 | 0.19489314160079  |
| H  | 2.99657287855917  | -4.54714022625031 | -4.69817148740627 |
| H  | 5.09833555781120  | -4.63626073098782 | 1.74895193844662  |
| H  | -1.52616757414120 | -3.63544135450050 | -3.22793839306079 |
| H  | 3.38148577706442  | -7.95045693560024 | -1.26983076195302 |
| H  | 1.93818011488234  | -1.68343709213981 | -0.06192994065962 |
| H  | 0.33895809751232  | -2.56448253571596 | 0.01194335647116  |
| Ni | 0.92459261364379  | -1.11874100554280 | -2.28443761519591 |
| H  | 1.97897066022507  | -0.96098747117947 | -4.53054571621448 |
| C  | 1.37006711739671  | -0.17786308551135 | -4.08176204359909 |
| C  | 0.30681362181889  | 0.37972463191130  | -4.97901776720303 |
| C  | 1.88563343037284  | 0.49061714739910  | -2.99258570100695 |
| H  | 2.90407164471951  | 0.32870727354838  | -2.66543286750546 |
| H  | 1.41199356962895  | 1.40349418552932  | -2.64453567823311 |
| H  | -0.31804135389534 | -0.40126905296355 | -5.41077500917715 |
| H  | 0.79564495055868  | 0.90764800394736  | -5.80374922978763 |
| H  | -0.33067843505449 | 1.08917853254191  | -4.45177907997793 |
| H  | -0.14900122404487 | -1.05789699467456 | -3.20188763409412 |

---

**3 B**  
**M1**

|    |                   |                   |                   |
|----|-------------------|-------------------|-------------------|
| O  | 2.70574969094803  | -1.38493033940969 | -0.50879163373445 |
| Si | 3.89153626618652  | -2.32840186837366 | -1.18935186531822 |
| O  | 0.10075047468324  | -2.16391551280460 | -1.13497318139243 |
| Si | -0.35571380305585 | -3.32096929500553 | -2.13914575125959 |
| O  | 0.84222376745672  | -3.66899704281780 | -3.21607309076698 |
| Si | 2.39759597283483  | -4.07914321249620 | -3.33400317650908 |
| O  | 3.33492805781580  | -2.99112319695438 | -2.55304331948260 |
| Si | 1.19087329489076  | -4.00538451386017 | 1.86129486467443  |
| O  | 0.17225284573892  | -5.06807190172097 | 1.17172553315961  |
| Si | -0.20576524439871 | -5.78755631872217 | -0.23853375146469 |
| O  | 2.72547762719287  | -4.54210856789857 | 1.72514133895544  |
| Si | 3.98573850512694  | -4.80047490803195 | 0.74404055292356  |
| O  | 1.10843870027398  | -6.57138604552996 | -0.79442546163126 |
| O  | 3.65878603422034  | -6.00583609253202 | -0.28938511809590 |
| Si | 2.60518852157174  | -6.53622245968890 | -1.41035248657394 |
| O  | 1.08372155435142  | -2.55633531970558 | 1.12469187588862  |
| O  | -0.70804959399768 | -4.69302420438062 | -1.31737755702353 |
| O  | 4.31013251960428  | -3.44202022408137 | -0.09776715609660 |
| O  | 2.65825194763215  | -5.54694905145607 | -2.69521550734309 |
| H  | 5.04047957891677  | -1.47821905104223 | -1.50664074970889 |
| H  | 0.87885092235540  | -3.89877863229816 | 3.29007904315380  |
| H  | -1.27109914389422 | -6.76476790698373 | -0.00103662373990 |
| H  | 2.79630648776715  | -4.08961553639349 | -4.74433205193203 |
| H  | 5.16544346284710  | -5.15137729401902 | 1.53745389372801  |
| H  | -1.53787893551669 | -2.97239121443556 | -2.94681479211223 |
| H  | 2.99656641065593  | -7.88539500918611 | -1.82476427167878 |
| H  | 2.22999980909389  | -1.80391037111728 | 0.26516029172660  |
| H  | 0.51878118610471  | -2.45946460815568 | 0.27681089726682  |

|    |                  |                   |                   |
|----|------------------|-------------------|-------------------|
| Ni | 1.28074782540052 | -0.71531266347946 | -1.64540925001310 |
| H  | 2.15745679261525 | 1.58393294912055  | -1.51585394887260 |
| C  | 2.06679312584761 | 0.84915659693139  | -2.31625914730488 |
| C  | 3.30041917770995 | 0.74273286065685  | -3.16965794917912 |
| C  | 0.74386743788842 | 0.80853711649399  | -2.96386857993087 |
| H  | 0.04511781660600 | 1.59590422369018  | -2.68590754477132 |
| H  | 0.75820913308863 | 0.66045272683909  | -4.04313138196584 |
| H  | 4.18734011399696 | 0.57359578532012  | -2.55758473182127 |
| H  | 3.47546990479157 | 1.66464282490060  | -3.73586214958684 |
| H  | 3.22937167655726 | -0.07536282913127 | -3.89030975404415 |
| H  | 0.12423907809137 | -0.14161489224038 | -2.61577130812267 |

**3 L  
M1**

|    |                   |                   |                   |
|----|-------------------|-------------------|-------------------|
| O  | 0.17416546641573  | -2.33501871285521 | 2.53967282548553  |
| Si | -0.02830895745161 | -3.73270325206702 | 3.41124624685484  |
| O  | 1.51178153920394  | -2.57933458323792 | 0.11689867800259  |
| Si | 2.12920924104188  | -3.91689154391752 | -0.50435698961001 |
| O  | 2.38427318861137  | -5.04791775510403 | 0.66366738954660  |
| Si | 1.77198391943578  | -5.84930366532603 | 1.92205886287893  |
| O  | 1.10009989823734  | -4.80916812575132 | 2.98841290430189  |
| Si | -2.12293971741720 | -3.02957133175651 | -0.39354777870127 |
| O  | -1.51457373094083 | -4.06082199811739 | -1.49121657296237 |
| Si | -0.37555171700536 | -5.17023043103854 | -1.83667896395122 |
| O  | -2.82674089536372 | -3.85269838097300 | 0.82866006059708  |
| Si | -2.55625561267220 | -4.91636542759630 | 2.02023358085882  |
| O  | -0.59439112997099 | -6.47041782479398 | -0.88150245782543 |
| O  | -1.92801391598755 | -6.27885126865300 | 1.41249218569711  |
| Si | -0.75222228532582 | -7.06858068378010 | 0.61566109451339  |
| O  | -0.93538141304378 | -2.10918139284928 | 0.23572718787174  |
| O  | 1.10172848794824  | -4.55389655618131 | -1.60945173291070 |
| O  | -1.52004144785833 | -4.27921814502038 | 3.10916296964364  |
| O  | 0.64139023127180  | -6.90888539757897 | 1.43431213301291  |
| H  | 0.12616323873075  | -3.41326147481462 | 4.83214934100423  |
| H  | -3.15702601284683 | -2.20397035662085 | -1.02559587557509 |
| H  | -0.52602505702254 | -5.58167240823561 | -3.23445390153795 |
| H  | 2.84132543098196  | -6.57673285438718 | 2.61117117060470  |
| H  | -3.81596304620103 | -5.21698928394681 | 2.70335485927509  |
| H  | 3.42682393836928  | -3.71176908821770 | -1.17123749063278 |
| H  | -1.09945542708091 | -8.48894741083997 | 0.53654478581487  |
| H  | -0.42966196464082 | -2.20802931035246 | 1.75039588430892  |
| H  | 0.04261206805238  | -2.27855072729598 | -0.00996971802446 |
| Ni | 1.94334681331933  | -1.92757633603230 | 1.87780163188047  |
| C  | 3.76691696904975  | -1.02792789965284 | 2.41698897452966  |
| C  | 4.12486116384732  | 0.38652954707704  | 1.99798009716156  |
| C  | 2.71050358947352  | -1.20102844003350 | 3.42156804039479  |
| H  | 2.88580386209601  | -1.92964131933391 | 4.21011381381107  |
| H  | 2.21824775543957  | -0.29827955476423 | 3.77685410148326  |
| H  | 4.73209803985616  | 0.40500587224994  | 1.09252260682640  |
| H  | 3.22528113969222  | 0.97630867209090  | 1.81892673456584  |
| H  | 4.69082127126865  | 0.86708969431438  | 2.79734434881321  |
| H  | 3.41543918805773  | -1.54444540109467 | 1.38748646013597  |
| H  | 4.65011989042878  | -1.64411044351159 | 2.59312451185609  |

**4 B  
M2**

|    |                  |                   |                   |
|----|------------------|-------------------|-------------------|
| O  | 1.71431712335963 | -1.43899381257867 | 2.46057759378708  |
| Si | 2.77589639009810 | -2.06965926021022 | 3.57069241919403  |
| O  | 2.16312058305261 | -0.95743652234832 | -0.45692823293479 |
| Si | 3.67338891456653 | -1.30804918392631 | -0.89025440066178 |

|    |                   |                   |                   |
|----|-------------------|-------------------|-------------------|
| O  | 4.54540751621183  | -1.07713008692867 | 0.50167185206197  |
| Si | 5.30031075899857  | -1.79310075350045 | 1.75757877776931  |
| O  | 4.27923797692910  | -1.82898490882808 | 3.02254392310557  |
| Si | 0.96505192491812  | -4.47363343559256 | 0.29169372769179  |
| O  | 2.03342818213988  | -4.69844213741087 | -0.91181593267823 |
| Si | 3.57728127497118  | -4.42674539827211 | -1.34828770205824 |
| O  | 1.52793561310765  | -5.10828201305060 | 1.67994618364245  |
| Si | 2.59477666753146  | -5.06862463978475 | 2.90221556880272  |
| O  | 4.58481174664119  | -5.08895439811133 | -0.25917691032499 |
| O  | 4.10964267234969  | -5.20470294683579 | 2.34073176010472  |
| Si | 5.22657640753659  | -4.85861763213674 | 1.21373892314752  |
| O  | 0.72452418999688  | -2.87103411684382 | 0.52380384486112  |
| O  | 3.85245593906979  | -2.83215046864563 | -1.41898426305825 |
| O  | 2.44965630226336  | -3.65350450395988 | 3.69630355619561  |
| O  | 5.70617129137000  | -3.31313402534872 | 1.36328661046084  |
| H  | 2.59671068566327  | -1.40525622925471 | 4.85982703259406  |
| H  | -0.29173579470140 | -5.14888753990017 | -0.04363857940800 |
| H  | 3.81475411403701  | -5.03505174634651 | -2.65858618337135 |
| H  | 6.49968343713503  | -1.03770242441858 | 2.11697040938527  |
| H  | 2.31035367805076  | -6.16567633288944 | 3.82841076500824  |
| H  | 4.22974353203096  | -0.41335294058524 | -1.91595354429961 |
| H  | 6.37896224152185  | -5.74447572339866 | 1.38693408902574  |
| H  | 1.23487600619303  | -2.08575707831423 | 1.88082238132592  |
| H  | 1.21823842709500  | -2.20323918609754 | -0.03684999494506 |
| Ni | 2.32255363089389  | 0.09149909129381  | 1.17108136304426  |
| H  | 0.11103969503514  | 0.11897419879043  | 0.44743007830665  |
| C  | 0.50618614096787  | 1.00704963531073  | 0.94446231995465  |
| C  | -0.14430826044536 | 1.32497246704205  | 2.24493529094281  |
| C  | 0.81285460370993  | 2.13412921745140  | 0.01685318583889  |
| H  | -0.15770325652843 | 0.46618753590048  | 2.91448172742609  |
| H  | -1.18969867676164 | 1.59345165216578  | 2.03699756448987  |
| H  | 0.33278667935838  | 2.16373861636423  | 2.74781067808518  |
| H  | 1.39260157873606  | 1.81029866282233  | -0.84884475937073 |
| H  | 1.32645112598328  | 2.94954944879971  | 0.52571860708900  |
| H  | -0.13885436700172 | 2.52551768977026  | -0.36864097865530 |
| C  | 2.90430273481346  | 1.37313941994842  | 2.44498468472850  |
| N  | 3.29395056910092  | 2.13919180985941  | 3.21861656369628  |

**4 L**  
**M2**

|    |                  |                   |                   |
|----|------------------|-------------------|-------------------|
| O  | 3.26704035753699 | -0.76038762285120 | 0.08088355028739  |
| Si | 4.90686779657301 | -0.98483402910536 | -0.02485892110240 |
| O  | 1.24765744643903 | -0.11110566116469 | -2.05758559793121 |
| Si | 2.01273656924156 | 0.04801539726372  | -3.46646542548279 |
| O  | 3.53947285428845 | 0.52103854644573  | -3.01814537233254 |
| Si | 5.12063119169403 | 0.13094138883864  | -2.89344434322184 |
| O  | 5.43931920215889 | -0.18448273262721 | -1.33052228941306 |
| Si | 1.88837482651332 | -3.86177201889316 | -1.63009113174075 |
| O  | 1.77543945751313 | -3.73450316640338 | -3.24519868999783 |
| Si | 2.33970062623735 | -2.91288157951085 | -4.52929811530225 |
| O  | 3.40094230182827 | -4.27323184384993 | -1.19958213362865 |
| Si | 4.97608559872691 | -3.88751443352447 | -1.12941318468997 |
| O  | 3.93558830006601 | -3.16968192411342 | -4.68168898457712 |
| O  | 5.54452785896672 | -3.56774147836965 | -2.61559521636230 |
| Si | 5.37092644581236 | -2.78634277907363 | -4.02823834145240 |
| O  | 1.54489641587179 | -2.42488264534428 | -0.92845269533022 |
| O  | 2.07081381557743 | -1.32880323869153 | -4.32113995065722 |
| O  | 5.16602471345181 | -2.57664669603798 | -0.18225104494638 |
| O  | 5.44086472453086 | -1.18089179092613 | -3.78997850170284 |
| H  | 5.56564002977645 | -0.47379573453521 | 1.17505686245162  |
| H  | 0.97537700416465 | -4.90852344861516 | -1.16320863229308 |
| H  | 1.65876146932867 | -3.37876431842474 | -5.73833086306782 |

|    |                   |                   |                   |
|----|-------------------|-------------------|-------------------|
| H  | 5.95032621389005  | 1.24926810956304  | -3.34169690434921 |
| H  | 5.72427277622813  | -5.00503514046435 | -0.55235687169315 |
| H  | 1.46089149414374  | 1.09469636920541  | -4.33933946559464 |
| H  | 6.44483800081696  | -3.19000719978090 | -4.93717983850747 |
| H  | 2.68569787451825  | -1.52985964984045 | -0.14971350612795 |
| H  | 1.26828939130537  | -1.62771727796134 | -1.46443013147715 |
| Ni | 2.30085015637654  | 0.89649232471002  | -0.78741383626323 |
| H  | 0.39356740854270  | 0.17578262235048  | 0.36368350177667  |
| C  | 0.80630603717979  | 1.17931173581870  | 0.47586883919800  |
| H  | 1.24009678292049  | 1.35668190951203  | 1.45472512801774  |
| C  | -0.04427936440702 | 2.28299023933070  | -0.06352632939220 |
| H  | -0.28519463732571 | 2.09336714015716  | -1.11253625469551 |
| H  | 0.49021634131953  | 3.23251647904579  | -0.00367056798005 |
| C  | -1.34589709126896 | 2.37411255857809  | 0.73900110347609  |
| C  | 3.23828113587011  | 2.22807386690321  | 0.14789670326311  |
| N  | 3.83611266033057  | 3.03727496945730  | 0.71753918982726  |
| H  | -1.97091944787658 | 3.17607441703291  | 0.34340079748910  |
| H  | -1.14606487123815 | 2.58797118285606  | 1.79017153261112  |
| H  | -1.91215986762361 | 1.44320715304005  | 0.68013593291515  |

---

## 5 TS II B M2

|    |                   |                   |                   |
|----|-------------------|-------------------|-------------------|
| O  | 1.34900711316621  | -1.48990718831920 | 2.08984301178781  |
| Si | 2.45698988132291  | -1.96967444140734 | 3.23539162453127  |
| O  | 2.27158259185598  | -1.30399311884706 | -0.69321357741102 |
| Si | 3.80623914278069  | -1.58976193485838 | -1.09080189798424 |
| O  | 4.77548284988705  | -1.37484955301352 | 0.21103331583852  |
| Si | 5.21923010582013  | -1.78385803994475 | 1.70648992168005  |
| O  | 3.94606697986479  | -1.65681663114694 | 2.71578535166826  |
| Si | 1.12593460607844  | -4.82112762140945 | 0.13758982183374  |
| O  | 2.36347362492532  | -5.09993782429230 | -0.87138945052475 |
| Si | 3.88680516404463  | -4.70854374803378 | -1.28957270341249 |
| O  | 1.50281950939355  | -5.32659014443938 | 1.63826419483719  |
| Si | 2.48984631989509  | -5.06271434836845 | 2.89962899566183  |
| O  | 4.88893245096817  | -5.09101481139386 | -0.06853028824505 |
| O  | 4.03486066308593  | -5.22870998266631 | 2.44520531684010  |
| Si | 5.29744547747635  | -4.86669796686044 | 1.48553365551946  |
| O  | 0.80494999048948  | -3.21654349884758 | 0.20540214450117  |
| O  | 3.97377229487237  | -3.12828809713737 | -1.61530563111407 |
| O  | 2.23865460978486  | -3.55589773734409 | 3.47261744508993  |
| O  | 5.73795880342063  | -3.32491182336807 | 1.73249378884997  |
| H  | 2.18921347308362  | -1.21998393169622 | 4.46449491926781  |
| H  | -0.05349826360644 | -5.56893400157767 | -0.30938973278848 |
| H  | 4.26368471217318  | -5.48177922663105 | -2.47485840833468 |
| H  | 6.29305409792341  | -0.90907968844924 | 2.17576271410607  |
| H  | 2.18172074752504  | -6.02257464002243 | 3.96126314706185  |
| H  | 4.29512830060962  | -0.70207603808364 | -2.15605460967548 |
| H  | 6.41590104413061  | -5.75009223058163 | 1.82064122302212  |
| H  | 1.01473006362380  | -2.23501007910948 | 1.52291905164949  |
| H  | 1.35041492662196  | -2.57385112818031 | -0.33538430379441 |
| Ni | 1.82866950712645  | -0.06541110952367 | 0.65738864245345  |
| H  | -0.01669418708882 | 0.63480181896853  | 0.84604757654158  |
| C  | 0.60215116830259  | 1.42645066470911  | 1.31596026412294  |
| C  | 0.19610848289115  | 1.59314029294103  | 2.75354166630104  |
| C  | 0.58086177576903  | 2.67512097990142  | 0.47621250222505  |
| H  | 0.30698958223081  | 0.66726617549046  | 3.31467639663552  |
| H  | -0.86191395818383 | 1.87460834684932  | 2.77790665312407  |
| H  | 0.77476476038118  | 2.37620340271488  | 3.23973304477592  |
| H  | 0.94092381604383  | 2.49935305995954  | -0.53826060637734 |
| H  | 1.18263624152462  | 3.46203558708013  | 0.92759928481784  |
| H  | -0.45406093017681 | 3.02502464215861  | 0.40297705226115  |



|   |                  |                  |                  |
|---|------------------|------------------|------------------|
| C | 2.60993647162691 | 1.29078629611657 | 1.60998659442836 |
| N | 3.35696598833380 | 1.99095931866516 | 2.15353188822774 |

## 5 TS II L

### M2

|    |                   |                   |                   |
|----|-------------------|-------------------|-------------------|
| O  | 2.99522588272340  | -0.78728542710915 | 0.09833748048852  |
| Si | 4.63901981796128  | -0.92984418275340 | -0.10041685934046 |
| O  | 1.49653291303431  | -0.17809754500707 | -2.36282074401824 |
| Si | 2.17382653064274  | -0.03196632736236 | -3.81433043515901 |
| O  | 3.73021291212162  | 0.46171239196839  | -3.67102867968777 |
| Si | 5.18030515761435  | 0.06033775367585  | -3.08027203933749 |
| O  | 5.06710105808223  | -0.21131325539518 | -1.47853761197943 |
| Si | 1.87928834095388  | -3.91988745567950 | -1.80304026949690 |
| O  | 1.88914359617329  | -3.84459335666689 | -3.42296711508722 |
| Si | 2.53485266776983  | -3.04105889019518 | -4.68475215805161 |
| O  | 3.35661883139876  | -4.30342987120303 | -1.23897728010296 |
| Si | 4.90679338596228  | -3.86728283608848 | -1.04175245241547 |
| O  | 4.14775366200961  | -3.24044516852561 | -4.66929883620163 |
| O  | 5.60271815249965  | -3.58897775239556 | -2.47677670538864 |
| Si | 5.55862662192065  | -2.89697168199961 | -3.94777251276879 |
| O  | 1.45922219876828  | -2.46699075040301 | -1.17705606615274 |
| O  | 2.15828642434709  | -1.47402149280671 | -4.58067296191203 |
| O  | 4.97469685766427  | -2.51414163833981 | -0.13590572943710 |
| O  | 5.72780093023329  | -1.29149254014723 | -3.79635991115933 |
| H  | 5.30243122525568  | -0.28281869468223 | 1.03095410368203  |
| H  | 0.94191890798969  | -4.95873805195849 | -1.36649073883252 |
| H  | 1.99709217606058  | -3.59885849839797 | -5.92757698164169 |
| H  | 6.12785806215201  | 1.14990564730446  | -3.31935820064080 |
| H  | 5.62695335969521  | -4.93593191515218 | -0.34758171653633 |
| H  | 1.48624064545284  | 0.94322400230155  | -4.67426859361474 |
| H  | 6.65811955114376  | -3.42302207350631 | -4.75919694899543 |
| H  | 2.47246231587708  | -1.56860807157144 | -0.22007466631397 |
| H  | 1.33805143374830  | -1.67488019053770 | -1.77525866154487 |
| Ni | 1.96793395745216  | 0.77164579806412  | -0.80439148488420 |
| H  | 0.63884135949692  | 0.47661413233068  | 0.78909611937484  |
| C  | 0.97667500575726  | 1.52443525605240  | 0.75535723085443  |
| H  | 1.38633071999474  | 1.77704254086249  | 1.72730834233024  |
| C  | -0.07221434083101 | 2.48694986247102  | 0.26316259879908  |
| H  | -0.35955760417547 | 2.24817408216454  | -0.76542014759180 |
| H  | 0.33879227105518  | 3.49713646528272  | 0.25486984995160  |
| C  | -1.30485389177387 | 2.42275548132915  | 1.15883238232136  |
| C  | 2.74564512203478  | 2.17989391068644  | 0.06165782272807  |
| N  | 3.44157835409309  | 3.04825527846449  | 0.38664820639004  |
| H  | -2.05837331465495 | 3.13433498064882  | 0.81900262065730  |
| H  | -1.05333433458959 | 2.66902425339636  | 2.19217638399038  |
| H  | -1.75369692311668 | 1.42762583088108  | 1.14796336672603  |

## 5 B

### M2

|    |                   |                   |                   |
|----|-------------------|-------------------|-------------------|
| O  | 1.74146047094344  | -1.56355714079792 | -1.06201781798178 |
| Si | 2.98351058360862  | -2.30455315460237 | -1.84604622607156 |
| O  | -0.68242090472897 | -3.30384853842202 | -0.94567457998289 |
| Si | -0.83401344738608 | -4.74553637413577 | -1.62128262505390 |
| O  | 0.21932941157570  | -4.94344219433231 | -2.87457879098897 |
| Si | 1.78359157385579  | -4.87415599113873 | -3.26100604222763 |
| O  | 2.41567166587369  | -3.42279917080093 | -2.86973154100377 |
| Si | 1.53060738530322  | -3.93755813497775 | 1.95506764912693  |
| O  | 0.83941601284398  | -5.38333626713041 | 1.69048830209431  |
| Si | 0.49166998498607  | -6.51737822898235 | 0.57663979548102  |
| O  | 3.10965086021561  | -3.98817840671410 | 1.54591568350750  |
| Si | 4.21061137714358  | -4.12757482059678 | 0.36605289406231  |
| O  | 1.87533103593973  | -7.01040408768326 | -0.12746968056842 |

|    |                   |                   |                   |
|----|-------------------|-------------------|-------------------|
| O  | 4.10217229519179  | -5.58110872668765 | -0.34528991281561 |
| Si | 3.13288564564506  | -6.65711591987492 | -1.08452759666308 |
| O  | 0.79350240802148  | -2.79043227210307 | 1.06543906054819  |
| O  | -0.52503030227038 | -5.93052052390235 | -0.53141679886171 |
| O  | 3.97704470955915  | -2.96172926117871 | -0.74728557316529 |
| O  | 2.61734483398628  | -6.03859620900426 | -2.49293120257039 |
| H  | 3.70216540726036  | -1.29157793830627 | -2.62836002806768 |
| H  | 1.45871992808226  | -3.62356707694275 | 3.38641434738626  |
| H  | -0.12095087132399 | -7.66652780121077 | 1.24914179912353  |
| H  | 1.93758677067960  | -5.06352927060423 | -4.70745191929663 |
| H  | 5.55314204373832  | -3.97023662372645 | 0.93146944955060  |
| H  | -2.17492160353354 | -5.00388764603734 | -2.17315417888280 |
| H  | 3.89943407789745  | -7.87739337653764 | -1.35049911773207 |
| H  | 1.53718442743808  | -1.90674519418907 | -0.15651098529249 |
| H  | 0.09875081453903  | -3.06714719457582 | 0.38343484610437  |
| Ni | -0.17326204347996 | -1.78332380759836 | -1.96085751805354 |
| H  | 1.50834992647650  | 1.57197901485381  | -5.00624463445690 |
| C  | 0.42907413369626  | 1.38427695421110  | -5.01932388045882 |
| C  | 0.03752176984147  | 0.84388566139820  | -6.39495196993499 |
| C  | -0.30464434787727 | 2.67905936455829  | -4.67128972853332 |
| H  | 0.56653532917357  | -0.08018588781193 | -6.62609724843685 |
| H  | 0.28437239719256  | 1.58505038727367  | -7.15541647192552 |
| H  | -1.03447990302644 | 0.64898110510895  | -6.44034071085607 |
| H  | -1.38290512787393 | 2.51656917340510  | -4.65863605070481 |
| H  | -0.07931501916333 | 3.43383943267508  | -5.42503577463346 |
| H  | -0.00095827423891 | 3.05980668867989  | -3.69666183464437 |
| C  | 0.18988456848044  | 0.37725003449879  | -3.99666750054035 |
| N  | -0.00500000428633 | -0.42325057605651 | -3.19554588657932 |

## 5 B M2

|    |                   |                   |                   |
|----|-------------------|-------------------|-------------------|
| O  | 2.80035005057423  | -1.08660973985039 | -0.37833217803667 |
| Si | 3.97032087032459  | -2.12060876298904 | -0.93266671585055 |
| O  | 0.15508860443984  | -1.75956091227838 | -1.42568758452725 |
| Si | -0.15978189124580 | -2.81926440531178 | -2.57143523901908 |
| O  | 1.17584527463346  | -3.18930499941818 | -3.46453204890971 |
| Si | 2.70867816278489  | -3.67747430717273 | -3.36126403423540 |
| O  | 3.56930772833468  | -2.68379275105394 | -2.39295666450077 |
| Si | 0.75070934104073  | -3.73292099901179 | 1.56177635102878  |
| O  | -0.18269870394441 | -4.69225857030625 | 0.63698381076558  |
| Si | -0.42560071660861 | -5.36130463458135 | -0.82450403801681 |
| O  | 2.24811120386863  | -4.37279813716988 | 1.70580109002306  |
| Si | 3.60214386879640  | -4.67875756389367 | 0.87049902100844  |
| O  | 0.89222687571913  | -6.22585198130829 | -1.23609586167627 |
| O  | 3.33153340225236  | -5.81805799805370 | -0.25216272061263 |
| Si | 2.47626846016810  | -6.23272689241532 | -1.57232998062371 |
| O  | 0.87533397857182  | -2.26089587158783 | 0.88504341687705  |
| O  | -0.71905295449917 | -4.22492928550552 | -1.93505391884293 |
| O  | 4.12460972661102  | -3.31696448550462 | 0.14373486275754  |
| O  | 2.79895799837302  | -5.18766651753357 | -2.77010288837737 |
| H  | 5.22280094948653  | -1.36756088502411 | -1.05015611196581 |
| H  | 0.17264176401252  | -3.66501303838144 | 2.90925144123557  |
| H  | -1.57268376981263 | -6.27064603186569 | -0.74265851303714 |
| H  | 3.31858660112615  | -3.65510364083292 | -4.69440579429550 |
| H  | 4.64280612722905  | -5.14831840173764 | 1.78818929126143  |
| H  | -1.17139376394687 | -2.35604436036000 | -3.54305180610327 |
| H  | 2.87729608997447  | -7.57967755376013 | -1.98669357744859 |
| H  | 2.18099340026498  | -1.50362254719897 | 0.28812272858463  |
| H  | 0.43153190856176  | -2.10298814541483 | -0.03955188632586 |
| Ni | 1.46588049581410  | -0.27407735748135 | -1.63949181020075 |
| C  | -2.63719238963430 | 0.83595222782663  | -4.11169341386636 |
| C  | -3.12610606130278 | 0.61228924784041  | -2.69291995292487 |

|   |                   |                   |                   |
|---|-------------------|-------------------|-------------------|
| C | -1.44402279954177 | 1.79844499919578  | -4.19304601140827 |
| H | -1.12122472828724 | 1.93964752423209  | -5.22731424804025 |
| H | -1.71467607146726 | 2.78215642683873  | -3.79820276777136 |
| H | -4.00046073966109 | -0.03895988102470 | -2.68739532365572 |
| H | -3.40859133836681 | 1.55486581148651  | -2.21770511472918 |
| H | -2.35851415014855 | 0.13687266053163  | -2.07850686177131 |
| H | -3.43185629551123 | 1.25820042810631  | -4.73084383551809 |
| H | -2.35157984937582 | -0.11635367262851 | -4.56357444974639 |
| C | -0.32335739796776 | 1.29738871509513  | -3.42433379132714 |
| N | 0.50181073835963  | 0.82400628950334  | -2.78120287017711 |

---

### 3 (TS connecting 3L to 3B isomerization I to b)

#### M1

|    |                   |                   |                   |
|----|-------------------|-------------------|-------------------|
| O  | -2.49091020349340 | -1.02398248553091 | 1.61192599045800  |
| Si | -3.32697292398650 | -1.62488650825628 | 2.90416746807416  |
| O  | 0.26816210712949  | -1.54660071231725 | 1.62171293300073  |
| Si | 1.09798409608633  | -2.20418216108625 | 2.81911699649834  |
| O  | 0.27276031589959  | -2.12668720874931 | 4.24548663049259  |
| Si | -1.12781249742307 | -2.41557620596544 | 4.98854786468008  |
| O  | -2.35831530614316 | -1.68540174255256 | 4.19939601687844  |
| Si | -1.43791621035025 | -4.37060262307599 | 0.04098962423308  |
| O  | -0.19586650700462 | -5.09657060217455 | 0.80013763973558  |
| Si | 0.70633640716663  | -5.20643591504141 | 2.14759624541427  |
| O  | -2.84304329752632 | -4.77786664357618 | 0.76976074491414  |
| Si | -3.67754723398923 | -4.65962097074393 | 2.15174659891704  |
| O  | -0.24164604109979 | -5.69175561677440 | 3.37974139275236  |
| O  | -2.88413690464853 | -5.39848526400850 | 3.35854606756154  |
| Si | -1.55282075991536 | -5.42707241155827 | 4.29111912281739  |
| O  | -1.27373263172351 | -2.75430814276998 | 0.09314762868574  |
| O  | 1.38812991379655  | -3.78502118906986 | 2.50259980699735  |
| O  | -3.89981423115857 | -3.08735661762583 | 2.52438468760918  |
| O  | -1.42421038619994 | -4.00899846090449 | 5.07158489148735  |
| H  | -4.43282475132070 | -0.70845827849469 | 3.20362680661625  |
| H  | -1.50373759330734 | -4.85753247575517 | -1.34130130135201 |
| H  | 1.75259300172056  | -6.21057198702504 | 1.93817818010346  |
| H  | -1.08173775958426 | -1.86557466761195 | 6.34770437216332  |
| H  | -4.99013429308203 | -5.28797898341848 | 1.98670801515018  |
| H  | 2.39649250089605  | -1.55443953954903 | 3.07108805175029  |
| H  | -1.68495864944701 | -6.50313459136565 | 5.27611494422999  |
| H  | -2.21096321621605 | -1.69595193881769 | 0.93289025544425  |
| H  | -0.50982762228147 | -2.33582966118304 | 0.63904867179353  |
| Ni | -0.78481604293325 | -0.00195991500517 | 2.03264880411970  |
| H  | -1.67445005454099 | 2.29833052430283  | 1.76678406399026  |
| C  | -1.25843726316712 | 1.74290842104605  | 2.60710688533034  |
| C  | -1.98736003008990 | 1.85415186862103  | 3.92851387047749  |
| C  | 0.30866690774796  | 1.37889628043528  | 2.53733847850865  |
| H  | 0.90028877824584  | 1.79835589057384  | 1.72421667631552  |
| H  | 0.82705468115743  | 1.31455958503820  | 3.49258906716772  |
| H  | -3.00993765289190 | 1.50083833650270  | 3.79322531733708  |
| H  | -2.04258808712827 | 2.87625610916359  | 4.31326845430594  |
| H  | -1.52724437396073 | 1.22164433996150  | 4.68762631304447  |
| H  | -0.30474618523275 | 2.51006216436290  | 2.76694572229538  |

---
